# Supplementary material for: Genomic Variation Underlying the Breeding Selection of Quinoa Varieties Longli-4 and CA3-1 in China
Source: MDPI journal article supplement (doi:10.3390/ijms232214030), 2022-11-14

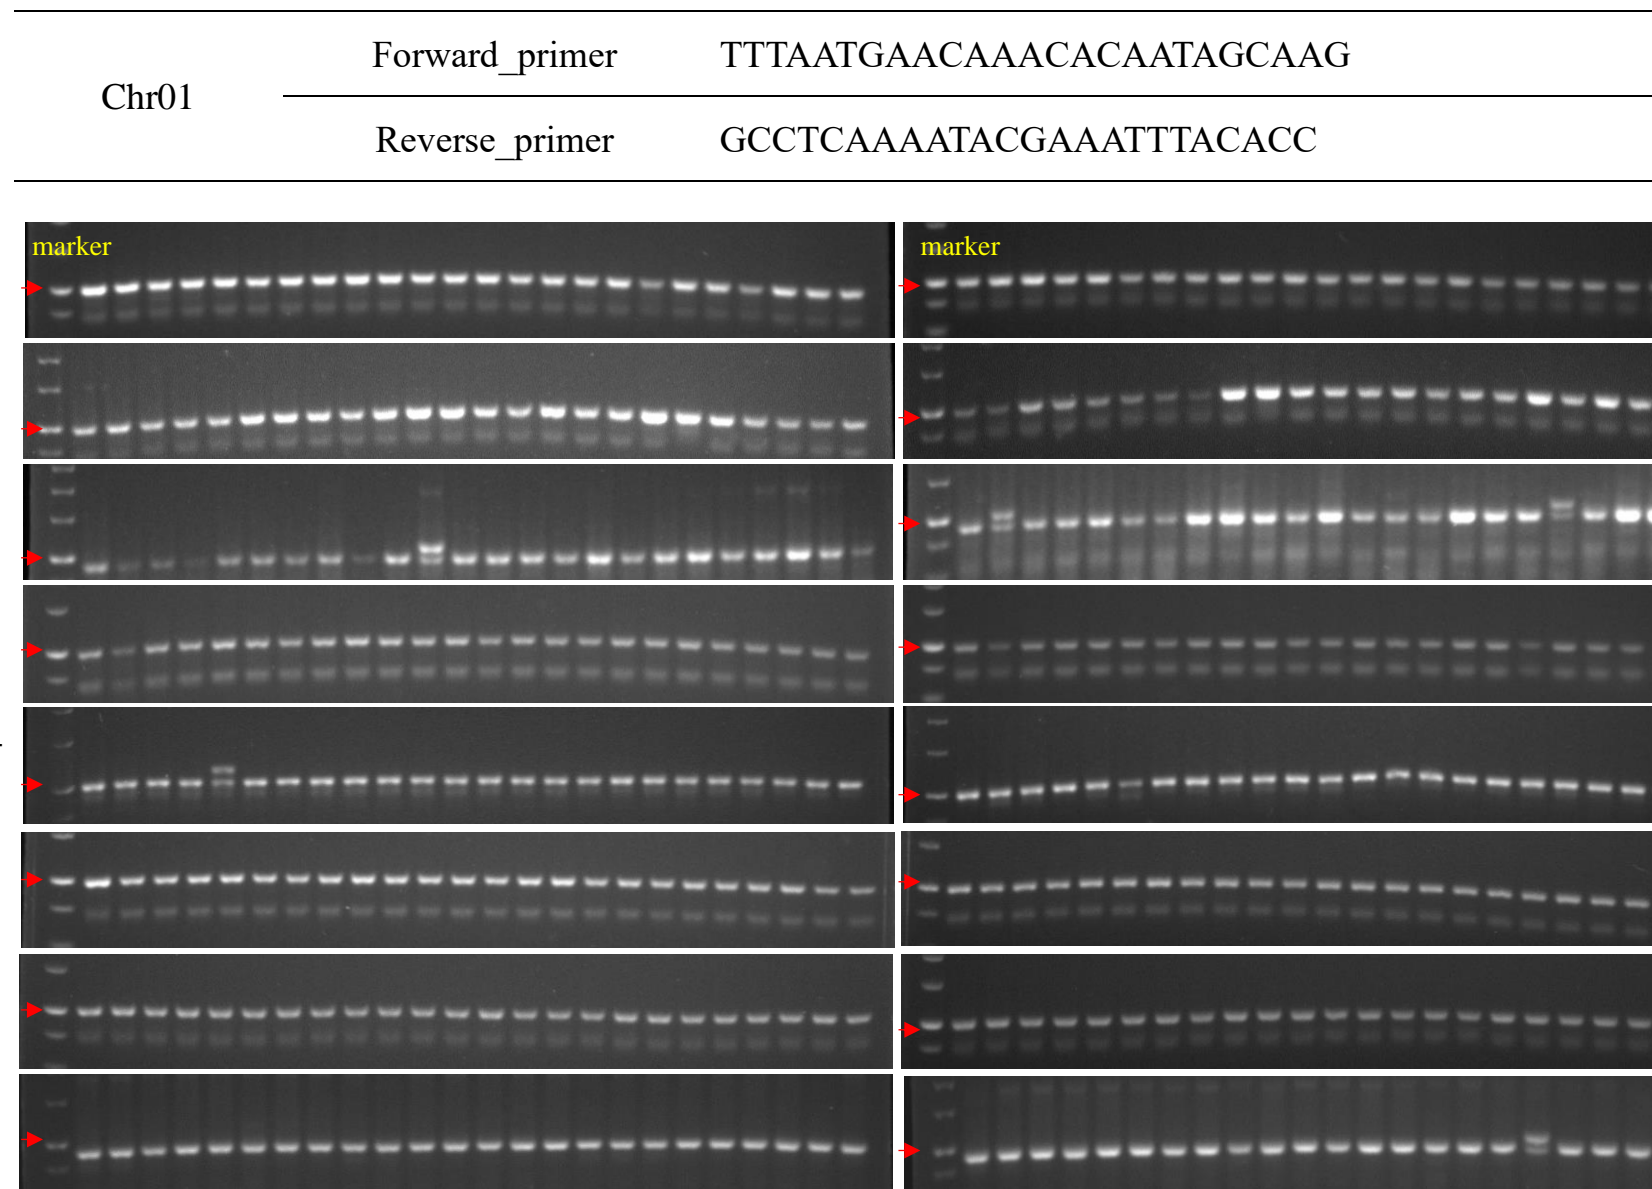

\*The red arrow points to the position of 200 bp band, the same as below.

|       |                |                      |
|-------|----------------|----------------------|
| Chr02 | Forward_primer | TTGCTCGAGACCAAGGTTTT |
|       | Reverse_primer | TCTTCCACTGCAATCTGACG |

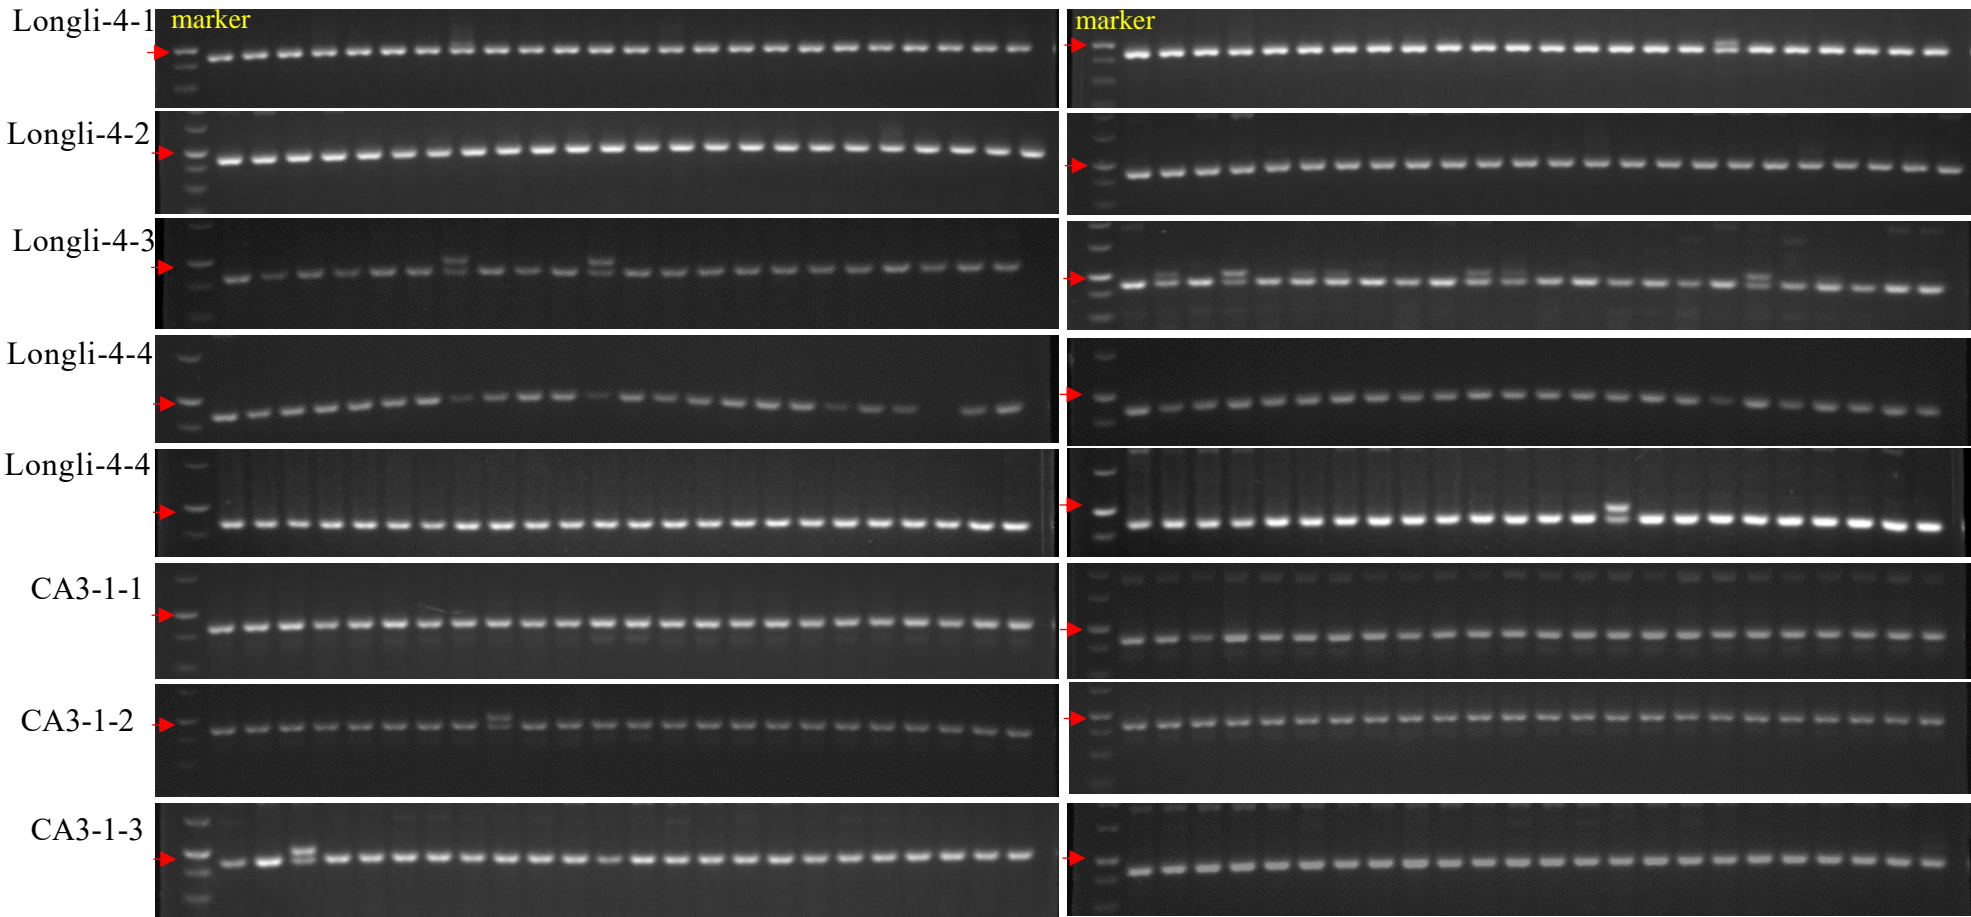

|       |                |                      |
|-------|----------------|----------------------|
| Chr03 | Forward_primer | GAGGATTCCTGCCAATTGTA |
|       | Reverse_primer | GCTTAAGGGGTTTGGATGGT |

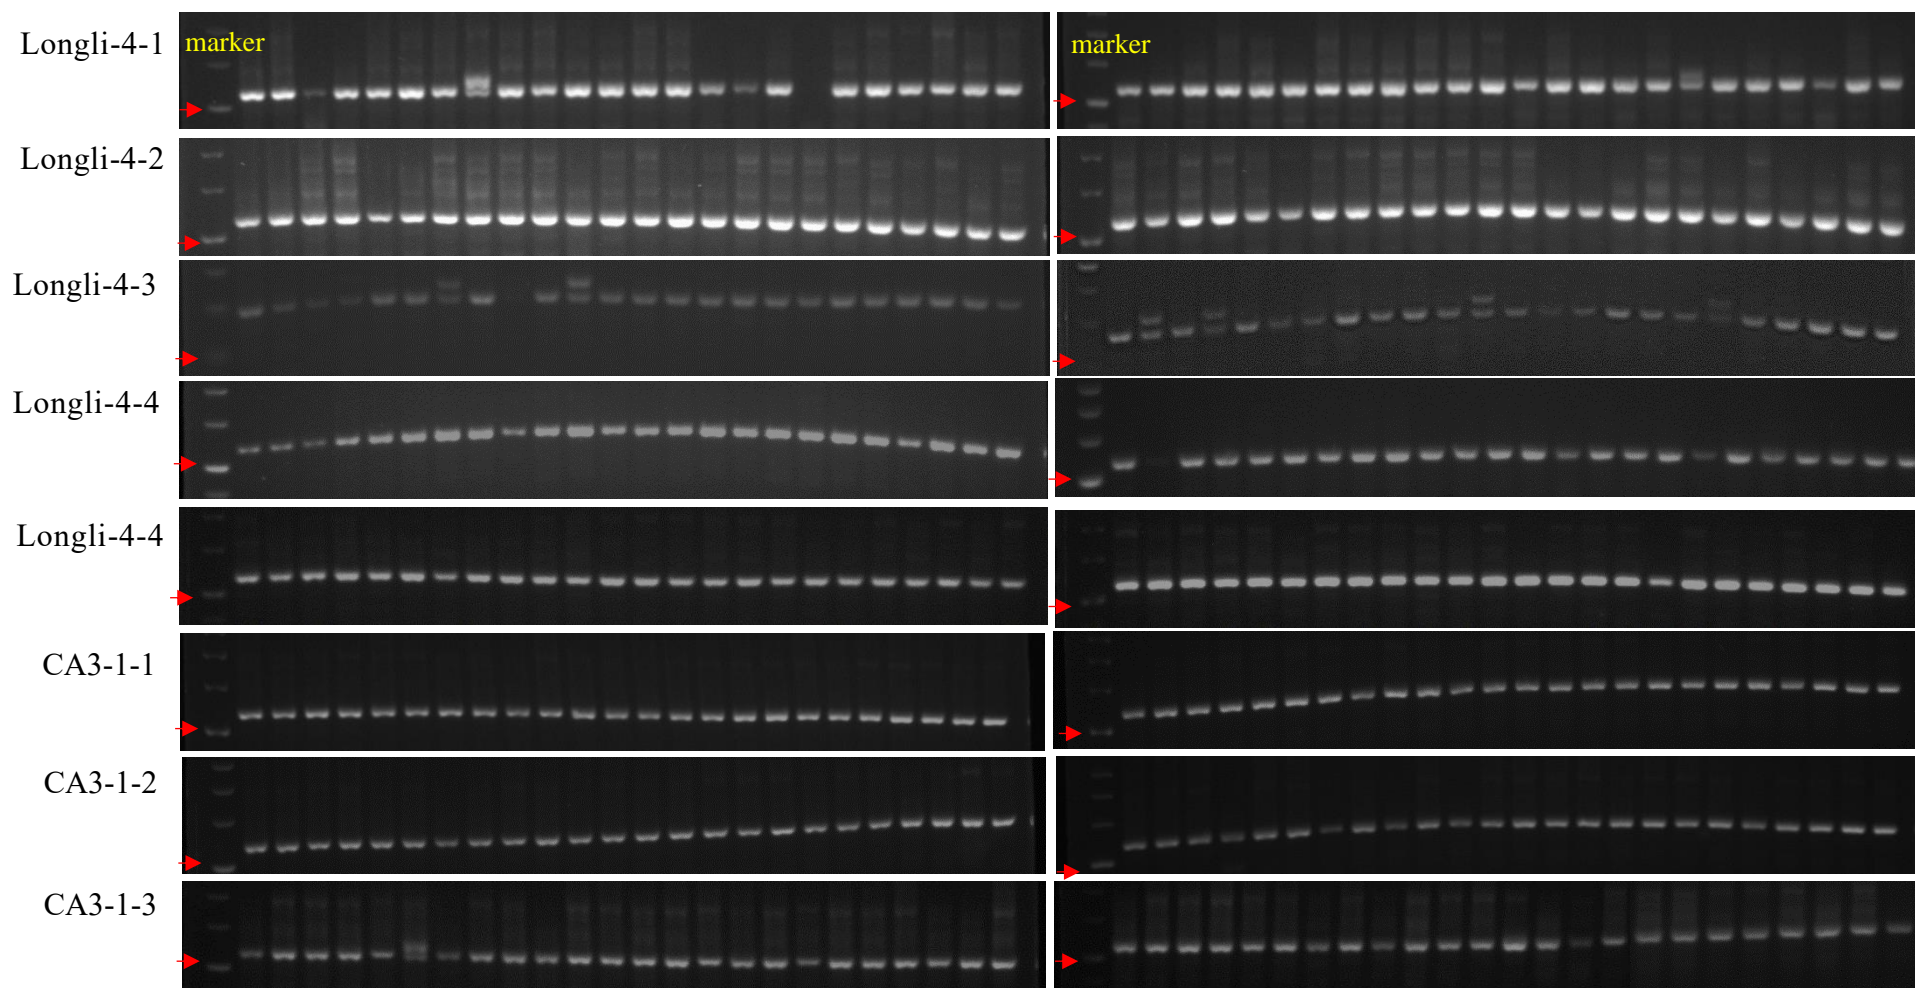



|       |                |                      |
|-------|----------------|----------------------|
| Chr04 | Forward_primer | AACTGGGGCTAGCTCACTCA |
|       | Reverse_primer | TTCCTCCACCTGTTTCGACT |

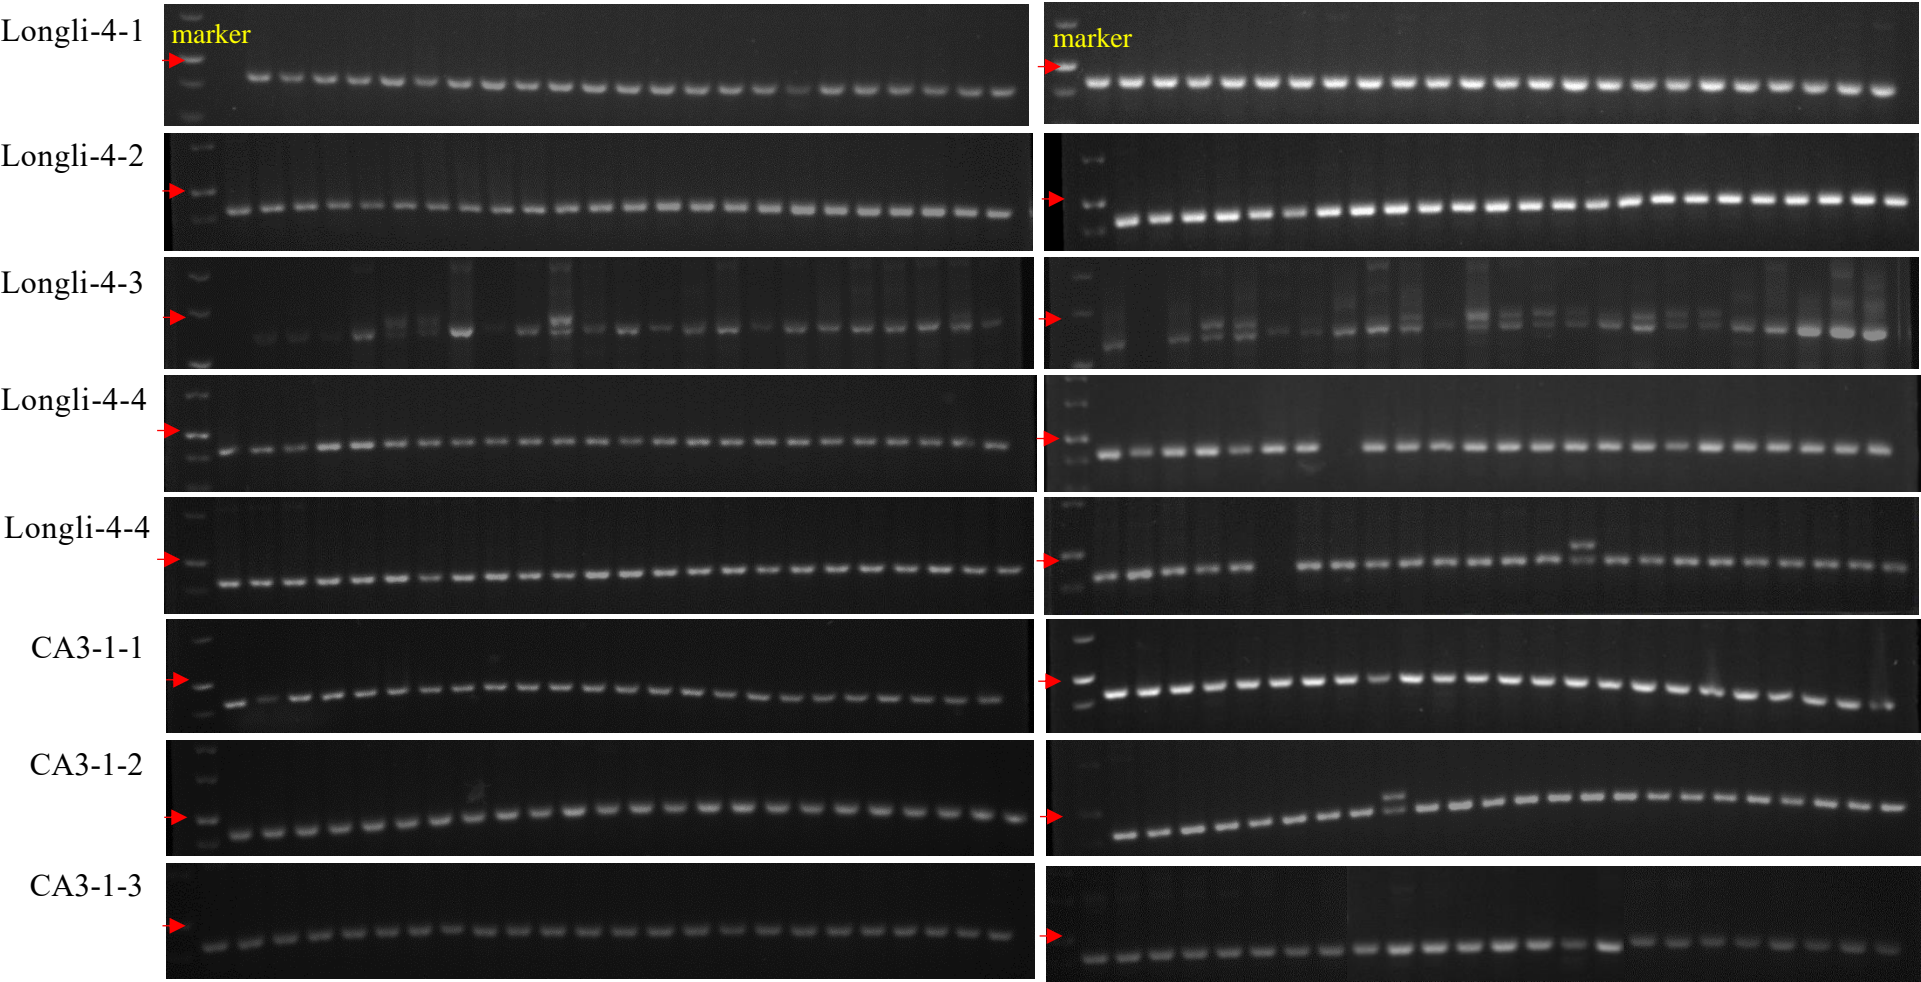



|       |                |                         |
|-------|----------------|-------------------------|
| Chr14 | Forward_primer | TCCACTTGTTTCCTCCTCCTT   |
|       | Reverse_primer | CGGATATGAAGTAACGATTACCA |

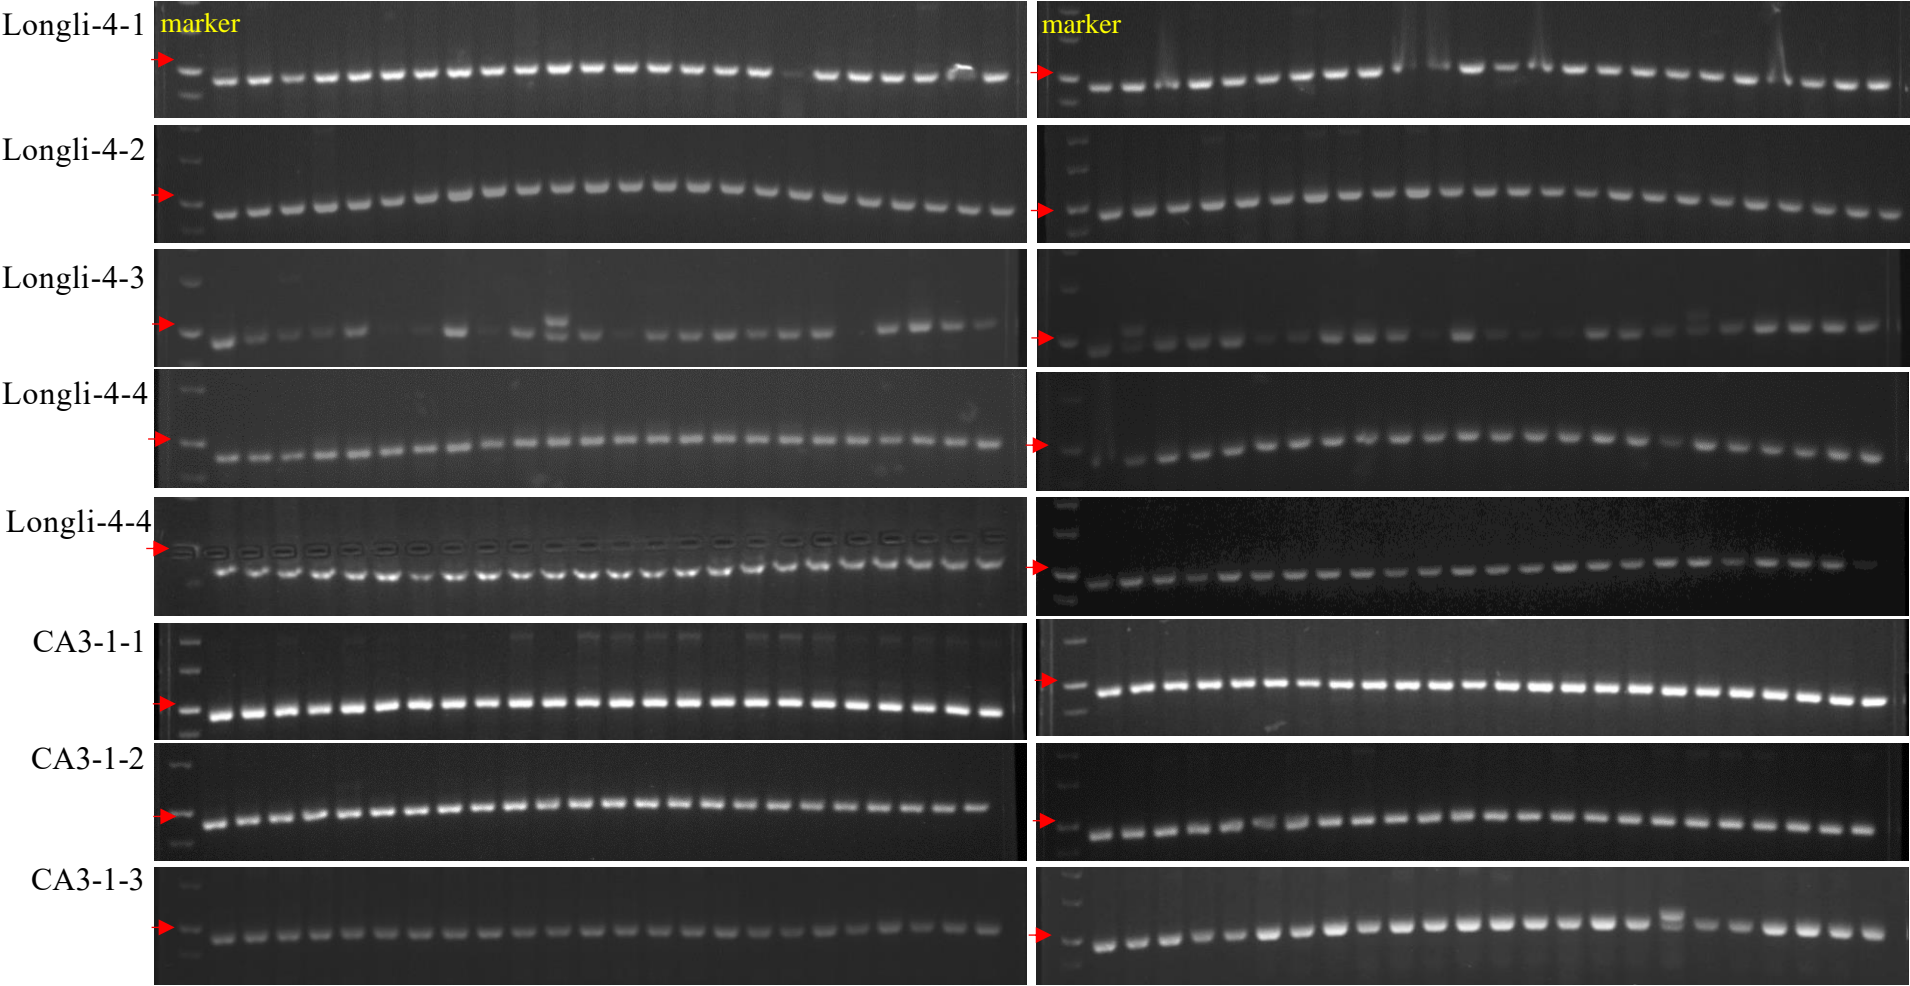



|       |                |                           |
|-------|----------------|---------------------------|
| Chr15 | Forward_primer | GTTGGATGTCACCATTGGAA      |
|       | Reverse_primer | TGCAAGCTAAGATAAGCTCACTACA |

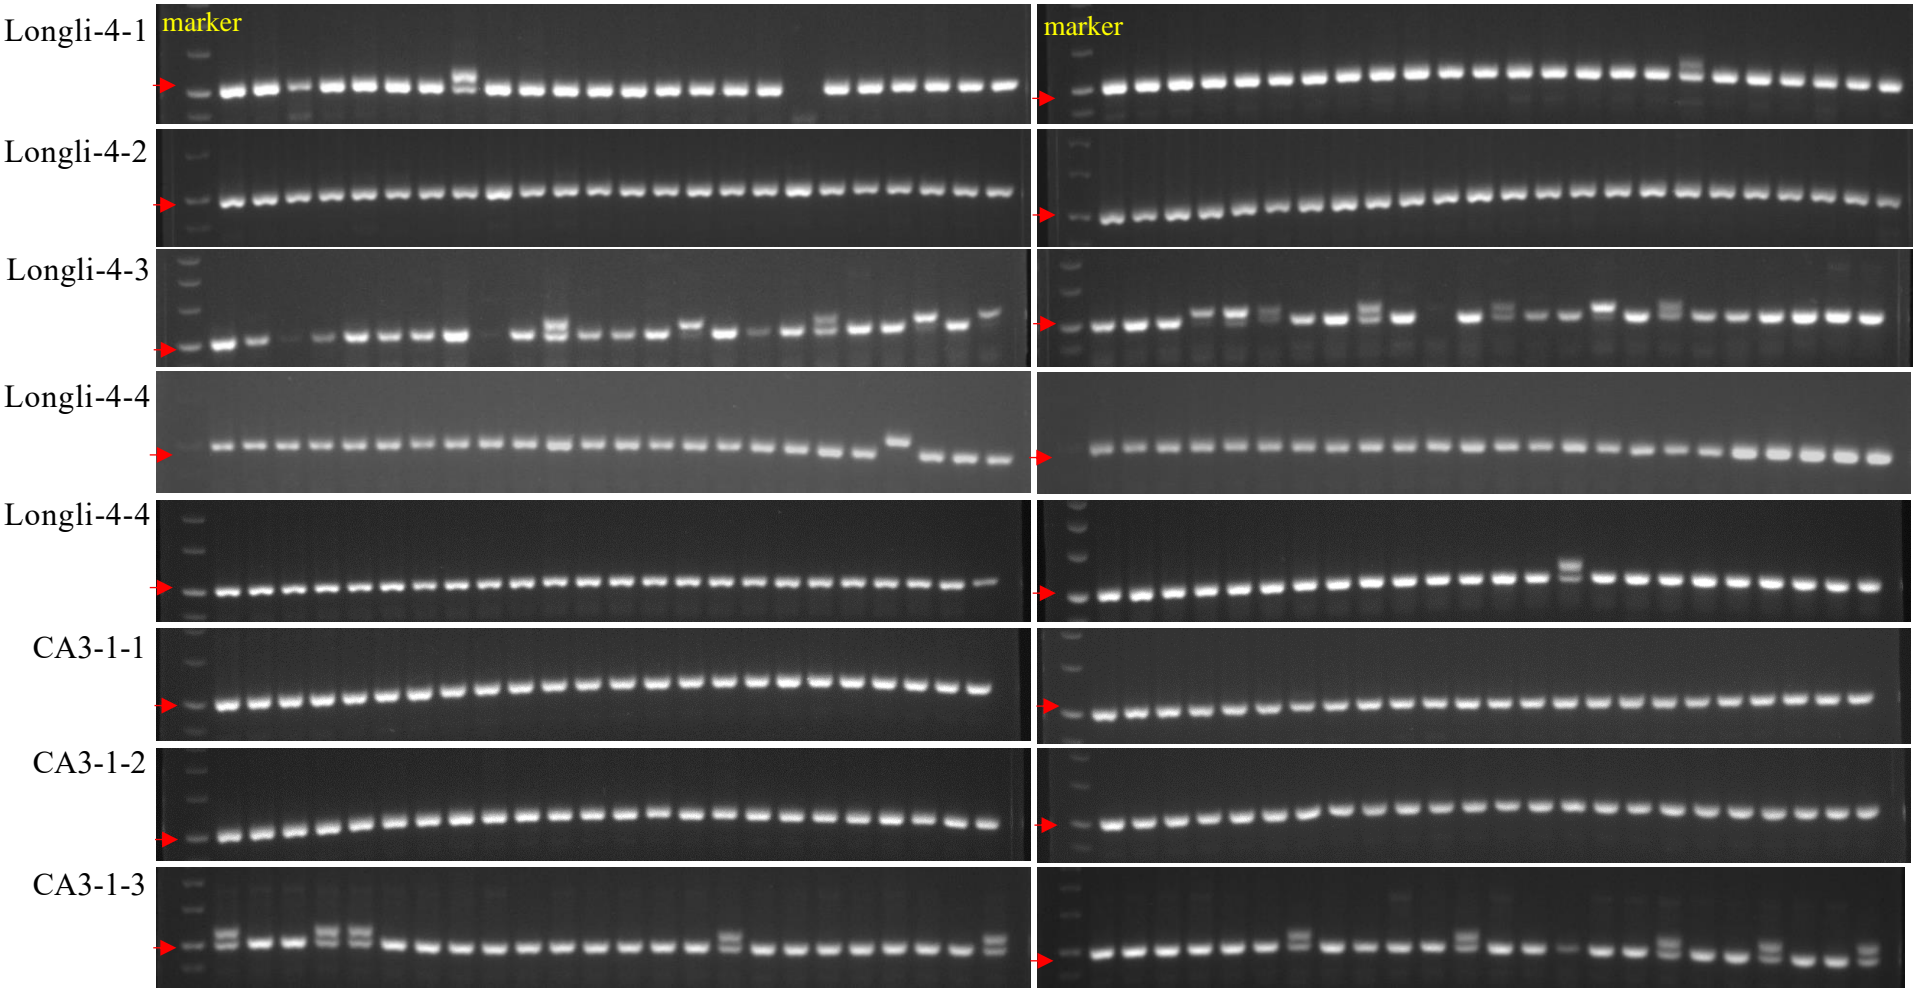

|       |                |                       |
|-------|----------------|-----------------------|
| Chr16 | Forward_primer | CCATGGACACTCTCAGGGTAA |
|       | Reverse_primer | GCTTAGGATCGCAAAGCTGA  |

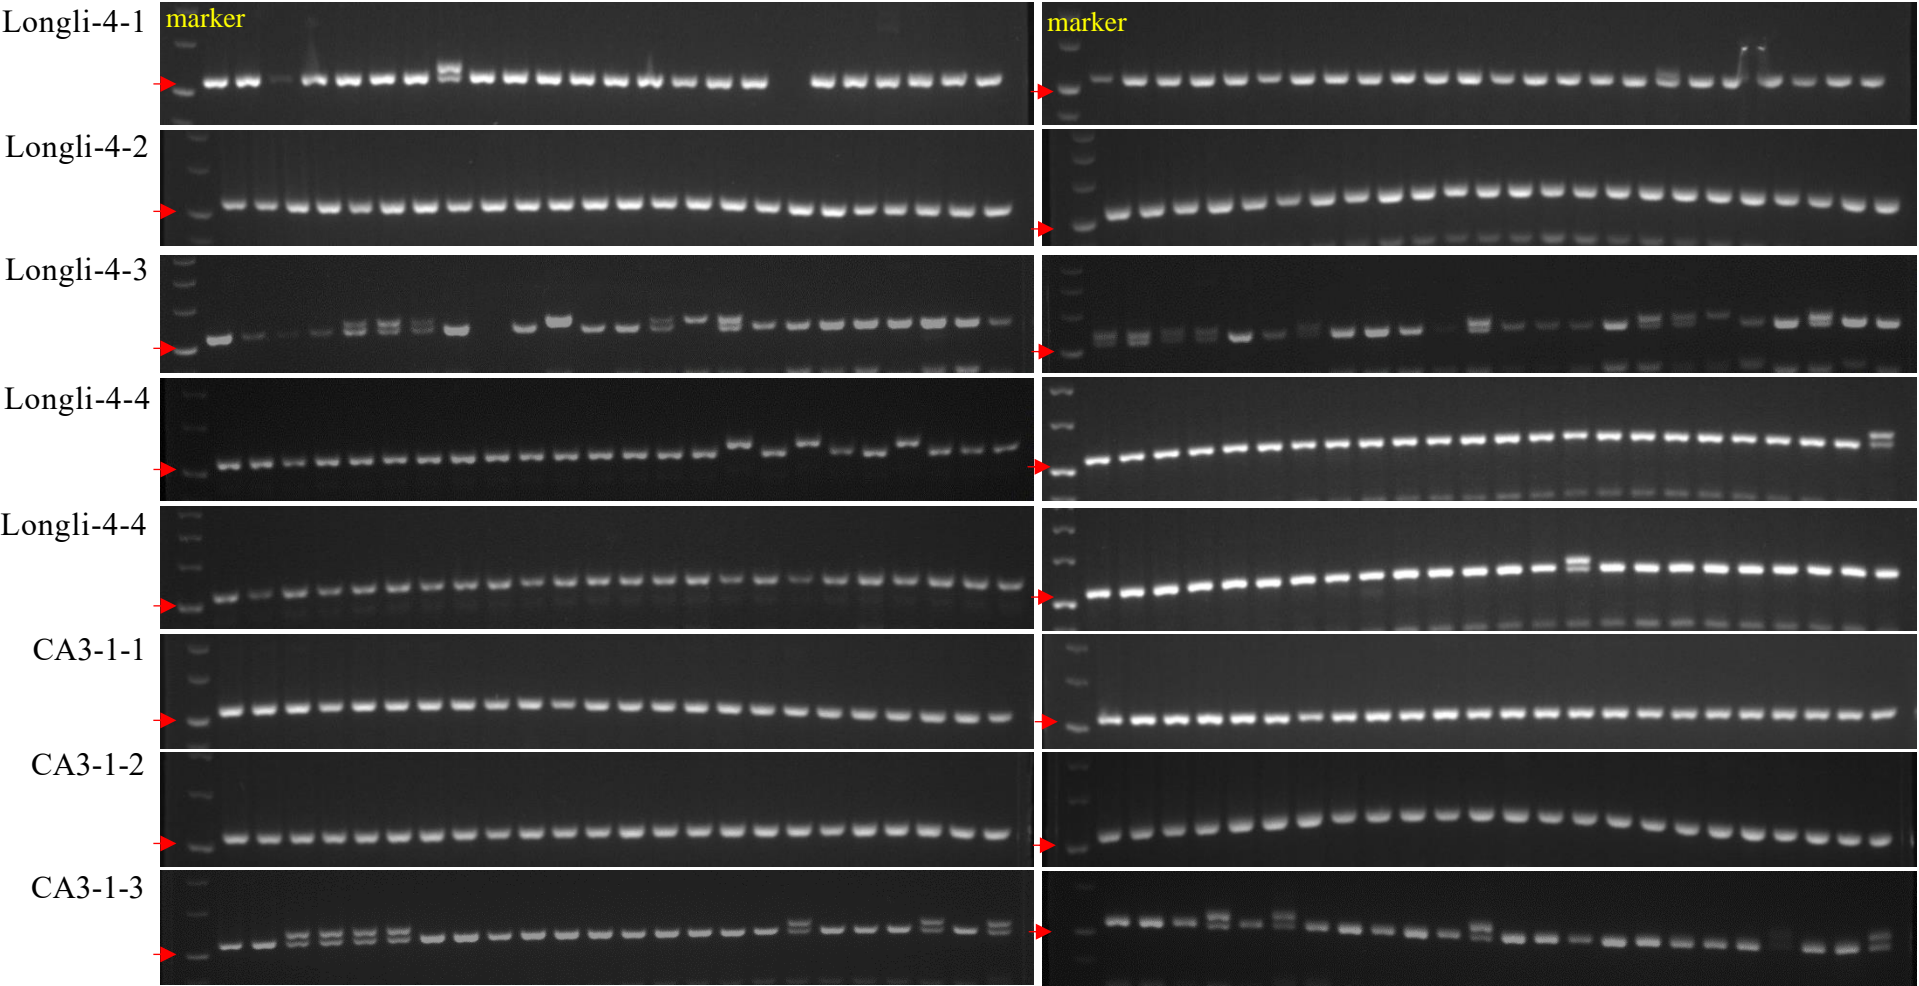



|       |                |                      |
|-------|----------------|----------------------|
| Chr17 | Forward_primer | TTCCAGGATGGACTCTTTGG |
|       | Reverse_primer | AACGTGTTCACACCATCACC |

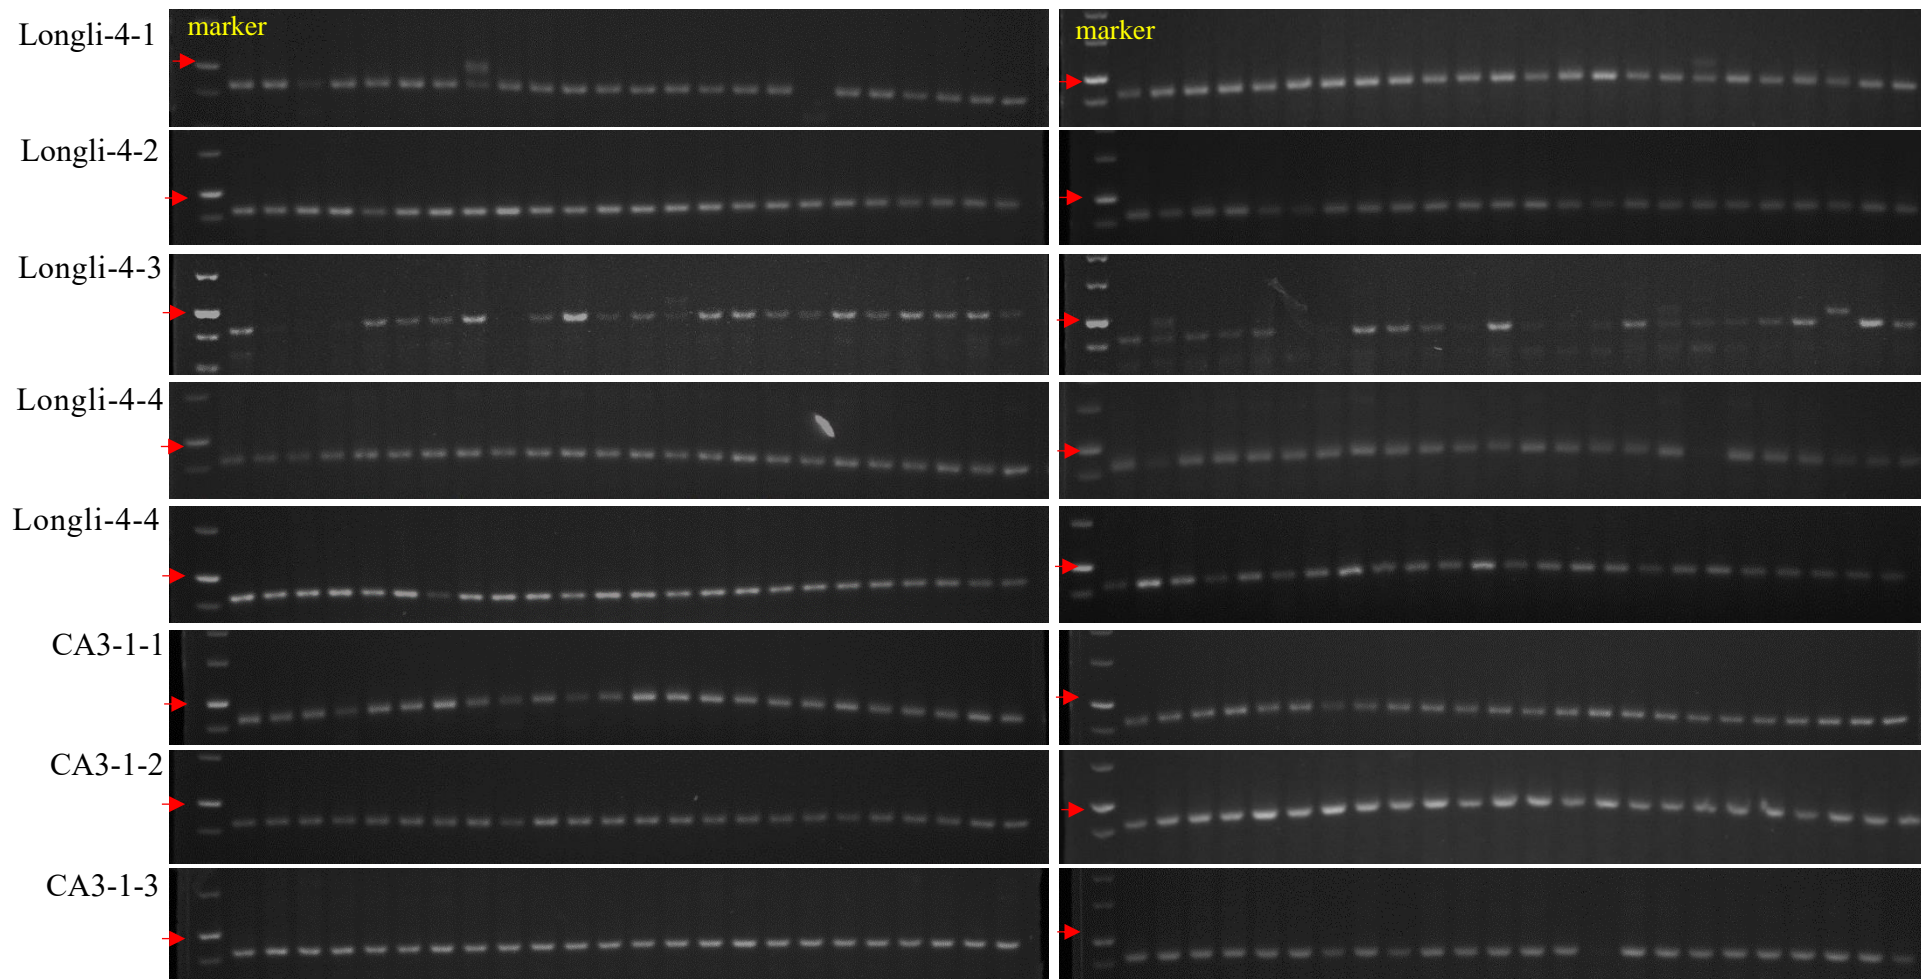

Supplement: s1 [file s1]
