# Supplementary material for: Genomic Variation Underlying the Breeding Selection of Quinoa Varieties Longli-4 and CA3-1 in China
Source: Int J Mol Sci. 2022 Nov 14;23(22):14030. doi: 10.3390/ijms232214030 (PMC9693436; doi:10.3390/ijms232214030)
Supplement: Supplementary file 1 [file ijms-23-14030-s001.zip]

Archive with 9 entries (9 files):
- Supplemental Figure S1 Phenotype comparisons of two quinoa varieties..pdf
- Supplemental Figure S2 Stacked bar charts of variation numbers in each of Longli-4 and CA3-1..pdf
- Supplemental Figure S3 Stacked bar charts of numbers of the pairwise SNPs and INDELs in Longli-4 and CA3-1..pdf
- Supplemental Figure S4 The shared SNPs and INDELs in Longli-4 and CA3-1..pdf
- Supplemental Figure S5 Boxplots of the heterozygosity values of SNP and INDEL in two sub-genomes..pdf
- Supplemental Figure S6 Genotyping using nine INDEL markers..pdf
- Supplemental Informations.pdf
- Supplemental Table S1 The distribution of SNPs or INDELs..xlsx
- Supplemental Table S2 The non-synonymous and stop-gain genes caused by the variations in Longli-4, CA3-1 or both of them..xlsx
