# Supplementary material for: Genomic Variation Underlying the Breeding Selection of Quinoa Varieties Longli-4 and CA3-1 in China
Source: Int J Mol Sci. 2022 Nov 14;23(22):14030. doi: 10.3390/ijms232214030 (PMC9693436; doi:10.3390/ijms232214030)
Supplement: Supplementary file 1 [file ijms-23-14030-s001.zip › Supplemental Table S1 The distribution of SNPs or INDELs..xlsx]

## Sheet: Sheet1
Supplemental Table S1 The distribution of SNPs or INDELs.
		The number of SNP		The number of INDEL		The number of SNP per 10kb length		The number of INDEL per 10kb length
sub-genome	chr	Longli-4	CA3-1	Longli-4	CA3-1	Longli-4	CA3-1	Longli-4	CA3-1
A	chr02	26724	139579	12299	31497	3.99971	21.4159	2.06277	5.29444
	chr04	23648	126620	11702	29669	2.60425	17.255	2.18618	5.54822
	chr07	34832	218522	20703	56480	0.531611	2.38652	1.82725	4.98473
	chr08	13829	91627	8316	20941	4.46185	37.3753	1.8505	4.66477
	chr10	13941	123076	9349	28164	7.3685	59.1244	1.53847	4.64505
	chr12	17892	108139	10826	25978	4.95105	32.0823	1.86657	4.47661
	chr13	5979	26841	3842	8647	17.2154	145.001	2.59512	5.85246
	chr14	19921	166871	10510	32449	0.439981	3.62354	1.7672	5.45198
	chr15	34161	146458	13610	33087	4.20307	30.7787	2.17541	5.29005
B	chr01	44485	356945	24123	72805	1.94677	10.1679	1.74593	5.27377
	chr03	30308	188642	14194	35494	4.30574	27.0125	1.74371	4.36335
	chr05	28562	185079	14174	37908	1.69994	15.0077	1.71799	4.59341
	chr06	25321	213272	12197	39908	2.40055	14.5089	1.62626	5.32209
	chr09	2601	21421	2755	7890	23.4233	100.423	1.87738	5.36884
	chr11	26116	191245	12468	37109	4.06335	25.291	1.65923	4.94646
	chr16	24716	176703	13859	38914	3.12111	22.3139	1.73886	4.88472
	chr17	27498	174532	13865	36039	3.29289	20.9002	1.64884	4.2958
	chr18	7117	75839	5373	18510	2.17811	23.2101	1.63213	5.62937
	Average	22647.3	151745	11898.1	32860.5	5.12262	33.7709	1.84777	5.04923
