# Supplementary material for: Genomic Variation Underlying the Breeding Selection of Quinoa Varieties Longli-4 and CA3-1 in China
Source: Int J Mol Sci. 2022 Nov 14;23(22):14030. doi: 10.3390/ijms232214030 (PMC9693436; doi:10.3390/ijms232214030)
Supplement: Supplementary file 1 [file ijms-23-14030-s001.zip › Supplemental Table S2 The non-synonymous and stop-gain genes caused by the variations in Longli-4, CA3-1 or both of them..xlsx]

## Sheet: Sheet1
Supplemental Table S2. The non-synonymous and stop-gain genes caused by the variations in Longli-4, CA3-1 or both of them
The genes marked in yellow and green are the stop-gain genes in the main text Table2.
Varieties	agronomic trait	quinoa gene ID	Gene number	sequence identity value (%)	chronosome	Putative Annotation	species
Longli-4	Betalain	AUR62016866	Mj10	44.654	Chr17	BAHD acyltransferase	Mirabilis
Longli-4	Flowering	AUR62006590	AT5G06100.2	36.557	Chr05	Myb domain protein 33 (MYB33)	Arabidopsis thaliana
Longli-4	Flowering	AUR62000244	AT5G06100.2	36.75	Chr12	Myb domain protein 33 (MYB33)	Arabidopsis thaliana
Longli-4	Flowering	AUR62015734	AT4G15090.1	67.692	Chr05	FRS (FAR1 Related Sequences) transcription factor family (FAR1)	Arabidopsis thaliana
Longli-4	Flowering	AUR62004357	AT4G00450.1	52.548	Chr01	RNA polymerase II transcription mediator (CCT)	Arabidopsis thaliana
Longli-4	Flowering	AUR62014784	AT1G61040.1	57.562	Chr01	Plus-3 domain-containing protein (VIP5)	Arabidopsis thaliana
Longli-4	Flowering	AUR62010809	AT5G41790.1	31.242	Chr13	COP1-interactive protein 1 (CIP1)	Arabidopsis thaliana
Longli-4	Flowering	AUR62019110	AT5G37770.1	49.655	Chr10	EF hand calcium-binding protein family (TCH2)	Arabidopsis thaliana
Longli-4	Seed size	AUR62041417	AT5G04560.2	55	Chr17	HhH-GPD base excision DNA repair family protein (DME)	Arabidopsis thaliana
Longli-4	Seed size	AUR62013606	Os04g0573900-01	53.817	Chr10	Cytochrome P450 704C1	Oryza sativa
Longli-4	Seed size	AUR62038065	GRMZM2G007915	69.584	Chr11	NEDD8-activating enzyme E1 catalytic subunit	Zea mays
Longli-4	Domestication	AUR62014155	Os02t0214300-01	62.046	Chr14	tRNase Z, Thermo-sensitive genic male sterility	Oryza sativa
CA3-1	MEP	AUR62024990	AT5G60600.1	84.73	Chr15	4-hydroxy-3-methylbut-2-enyl diphosphate synthase (HDS)	Arabidopsis thaliana
CA3-1	MEP	AUR62008212	AT5G62790.2	73.79	Chr16	1-deoxy-D-xylulose 5-phosphate reductoisomerase (DXR)	Arabidopsis thaliana
CA3-1	MEP	AUR62005484	AT2G26930.1	78.981	Chr14	4-(cytidine 5'-phospho)-2-C-methyl-D-erithritol kinase (CMK)	Arabidopsis thaliana
CA3-1	MEP	AUR62042241	AT2G02500.1	70.8	Chr06	Nucleotide-diphospho-sugar transferases superfamily protein	Arabidopsis thaliana
CA3-1	MEP	AUR62011363	AT4G34350.1	77.193	Chr15	4-hydroxy-3-methylbut-2-enyl diphosphate reductase (HDR)	Arabidopsis thaliana
CA3-1	MEP	AUR62024257	AT2G26930.1	74.652	Chr06	4-(cytidine 5'-phospho)-2-C-methyl-D-erithritol kinase (CMK)	Arabidopsis thaliana
CA3-1	Flavonoid	AUR62028165	AT5G17050.1	45.033	Chr11	UDP-glucosyl transferase 78D2	Arabidopsis thaliana
CA3-1	Flavonoid	AUR62023632	AT5G08640.1	58.841	Chr10	Flavonol synthase 1 (FLS1)	Arabidopsis thaliana
CA3-1	Flavonoid	AUR62028162	AT5G17050.1	49.007	Chr11	UDP-glucosyl transferase 78D2	Arabidopsis thaliana
CA3-1	Flavonoid	AUR62036209	AT2G30490.1	84.524	Chr07	Cinnamate-4-hydroxylase (C4H)	Arabidopsis thaliana
CA3-1	Flavonoid	AUR62015655	AT3G55120.1	63.319	Chr05	Chalcone-flavanone isomerase family protein	Arabidopsis thaliana
CA3-1	Flavonoid	AUR62014672	AT5G08640.1	58.284	Chr01	Flavonol synthase 1 (FLS1)	Arabidopsis thaliana
CA3-1	Betalain	AUR62004461	Mj12	59.946	Chr01	UDP-glycosyltransferase	Mirabilis
CA3-1	Betalain	AUR62013276	Bv8_197570_yaar.t1	85.567	Chr01	ADHbeta	Beta vulgaris
CA3-1	Betalain	AUR62037832	Bv6_151210_mapy.t1	61.915	Chr14	wrky44	Beta vulgaris
CA3-1	Betalain	AUR62004626	Bv1_001300_sidm.t1	81.238	Chr01	Cytochrome P450 76AD1	Beta vulgaris
CA3-1	Betalain	AUR62022710	Bv1_001290_xkhk.t1	80.677	Chr10	Cytochrome P450 76AD1	Beta vulgaris
CA3-1	Betalain	AUR62004463	Mj12	56.873	Chr01	UDP-glycosyltransferase	Mirabilis
CA3-1	Betalain	AUR62026575	Mj11	65.672	Chr06	UDP-glycosyltransferase (74B1-like)	Mirabilis
CA3-1	Betalain	AUR62003014	Bv_25450_rwdj.t1	73.402	Chr06	BvGT (scopoletin glucosyltransferase)	Beta vulgaris
CA3-1	Flowering	AUR62022565	AT4G00450.1	57.757	Chr10	RNA polymerase II transcription mediator (CCT)	Arabidopsis thaliana
CA3-1	Flowering	AUR62004597	AT5G05690.1	60.321	Chr01	Cytochrome P450 superfamily protein (CPD)	Arabidopsis thaliana
CA3-1	Flowering	AUR62025878	AT1G18450.1	71.901	Chr16	Actin-related protein 4 (ARP4)	Arabidopsis thaliana
CA3-1	Flowering	AUR62019808	AT5G41790.1	31.058	Chr16	COP1-interactive protein 1 (CIP1)	Arabidopsis thaliana
CA3-1	Flowering	AUR62018537	AT3G04240.1	75.427	Chr07	Tetratricopeptide repeat (TPR)-like superfamily protein (SEC)	Arabidopsis thaliana
CA3-1	Flowering	AUR62003535	AT1G30970.1	57.143	Chr09	Zinc finger (C2H2 type) family protein (SUL4)	Arabidopsis thaliana
CA3-1	Flowering	AUR62002349	AT2G43410.2	41.872	Chr07	RNA binding protein (FPA)	Arabidopsis thaliana
CA3-1	Flowering	AUR62022683	AT1G01060.1	43.717	Chr10	Homeodomain-like superfamily protein (LHY)	Arabidopsis thaliana
CA3-1	Flowering	AUR62029348	AT4G27430.1	38.935	Chr12	COP1-interacting protein 7 (CIP7)	Arabidopsis thaliana
CA3-1	Flowering	AUR62023102	AT5G13790.1	51.21	Chr04	AGAMOUS-like 15 (AGL15)	Arabidopsis thaliana
CA3-1	Flowering	AUR62006825	AT1G09530.1	37.671	Chr05	Phytochrome interacting factor 3 (PIF3)	Arabidopsis thaliana
CA3-1	Flowering	AUR62037363	AT4G03400.1	66.667	Chr15	Auxin-responsive GH3 family protein (DFL2)	Arabidopsis thaliana
CA3-1	Flowering	AUR62040579	AT1G76710.1	63.004	Chr03	SET domain group 26 (ASHH1)	Arabidopsis thaliana
CA3-1	Flowering	AUR62005028	AT3G05040.1	62.248	Chr05	ARM repeat superfamily protein (HST)	Arabidopsis thaliana
CA3-1	Flowering	AUR62006814	AT4G16845.1	42.956	Chr05	VEFS-Box of polycomb protein (VRN2)	Arabidopsis thaliana
CA3-1	Flowering	AUR62013218	AT1G79460.1	48.507	Chr17	Terpenoid cyclases/Protein prenyltransferases superfamily protein (GA2)	Arabidopsis thaliana
CA3-1	Flowering	AUR62028984	AT2G06210.1	64.384	Chr02	Binding protein (ELF8)	Arabidopsis thaliana
CA3-1	Flowering	AUR62024322	AT2G42200.1	41.732	Chr11	Squamosa promoter binding protein-like 9 (SPL9)	Arabidopsis thaliana
CA3-1	Flowering	AUR62003557	AT1G09570.1	75.579	Chr09	Phytochrome A (PHYA)	Arabidopsis thaliana
CA3-1	Flowering	AUR62022218	AT1G52800.1	48.693	Chr18	2-oxoglutarate (2OG) and Fe(II)-dependent oxygenase superfamily protein	Arabidopsis thaliana
CA3-1	Flowering	AUR62003675	AT5G65540.1	49.271	Chr09	Transcription initiation factor TFIID subunit	Arabidopsis thaliana
CA3-1	Flowering	AUR62032218	AT1G57820.1	60.157	Chr08	Zinc finger (C3HC4-type RING finger) family protein (VIM1)	Arabidopsis thaliana
CA3-1	Flowering	AUR62029850	AT1G18450.1	91.892	Chr08	Actin-related protein 4 (ARP4)	Arabidopsis thaliana
CA3-1	Flowering	AUR62026729	AT1G43700.1	50.69	Chr10	VIRE2-interacting protein 1 (VIP1)	Arabidopsis thaliana
CA3-1	Flowering	AUR62037187	AT5G13480.2	60.719	Chr01	Transducin/WD40 repeat-like superfamily protein (FY)	Arabidopsis thaliana
CA3-1	Flowering	AUR62029605	AT3G48590.1	77.033	Chr08	Nuclear factor Y, subunit C1 (NF-YC1)	Arabidopsis thaliana
CA3-1	Flowering	AUR62016232	AT4G16280.2	47.202	Chr07	Flowering time control protein FCA	Arabidopsis thaliana
CA3-1	Flowering	AUR62026672	AT1G76710.1	62.138	Chr10	SET domain group 26 (ASHH1)	Arabidopsis thaliana
CA3-1	Flowering	AUR62001834	AT5G59820.1	41.5	Chr07	C2H2-type zinc finger family protein (RHL41)	Arabidopsis thaliana
CA3-1	Flowering	AUR62010233	AT1G79460.1	46.814	Chr15	Terpenoid cyclases/Protein prenyltransferases superfamily protein (GA2)	Arabidopsis thaliana
CA3-1	Flowering	AUR62001872	AT5G37055.1	65.942	Chr07	HIT-type Zinc finger family protein (SEF)	Arabidopsis thaliana
CA3-1	Flowering	AUR62009040	AT5G38150.1	35.079	Chr04	PLASTID MOVEMENT IMPAIRED protein (DUF827) (PMI15)	Arabidopsis thaliana
CA3-1	Flowering	AUR62028286	AT5G20730.1	60.282	Chr02	Transcriptional factor B3 family protein / auxin-responsive factor AUX/IAA-like protein (NPH4)	Arabidopsis thaliana
CA3-1	Flowering	AUR62014331	AT1G44446.1	78.383	Chr03	Pheophorbide a oxygenase family protein with Rieske 2Fe-2S domain-containing protein (CH1)	Arabidopsis thaliana
CA3-1	Flowering	AUR62015029	AT2G04030.1	67.291	Chr15	Chaperone protein htpG family protein (CR88)	Arabidopsis thaliana
CA3-1	Flowering	AUR62018790	AT5G47010.1	78.135	Chr16	RNA helicase (LBA1)	Arabidopsis thaliana
CA3-1	Flowering	AUR62019306	AT5G12840.1	45.817	Chr05	Nuclear factor Y, subunit A1 (NH-YA1)	Arabidopsis thaliana
CA3-1	Flowering	AUR62011753	AT1G02400.1	53.731	Chr08	Gibberellin 2-oxidase 6 (GA2OX6)	Arabidopsis thaliana
CA3-1	Flowering	AUR62013322	AT3G33520.1	63.801	Chr01	Actin-related protein 6 (ARP6)	Arabidopsis thaliana
CA3-1	Flowering	AUR62019023	AT4G24620.1	77.813	Chr10	Phosphoglucose isomerase 1 (PGI1)	Arabidopsis thaliana
CA3-1	Flowering	AUR62028030	AT3G10390.1	72.829	Chr01	FLOWERING locus D-like protein (FLD)	Arabidopsis thaliana
CA3-1	Flowering	AUR62040922	AT4G20400.1	41.778	Chr12	JUMONJI 14 (JMJ14)	Arabidopsis thaliana
CA3-1	Flowering	AUR62002298	AT1G25540.1	53.071	Chr07	Phytochrome and flowering time regulatory protein (PFT1)	Arabidopsis thaliana
CA3-1	Flowering	AUR62038483	AT5G04240.1	54.5	Chr06	Zinc finger (C2H2 type) family protein / transcription factor jumonji (jmj) family protein (ELF6)	Arabidopsis thaliana
CA3-1	Flowering	AUR62008513	AT5G61150.1	57.923	Chr16	Leo1-like family protein	Arabidopsis thaliana
CA3-1	Flowering	AUR62021990	AT4G04885.1	68.95	Chr01	PCF11P-similar protein 4	Arabidopsis thaliana
CA3-1	Flowering	AUR62003911	AT4G36920.1	47.959	Chr09	Integrase-type DNA-binding superfamily protein	Arabidopsis thaliana
CA3-1	Flowering	AUR62030195	AT5G46210.1	82.672	Chr02	Cullin4	Arabidopsis thaliana
CA3-1	Flowering	AUR62012495	AT1G18100.1	62.791	Chr02	PEBP (phosphatidylethanolamine-binding protein) family protein	Arabidopsis thaliana
CA3-1	Flowering	AUR62007328	AT2G23380.1	51.952	Chr13	SET domain-containing protein	Arabidopsis thaliana
CA3-1	Flowering	AUR62005522	AT3G26120.1	40.984	Chr14	Terminal EAR1-like 1	Arabidopsis thaliana
CA3-1	Flowering	AUR62026878	AT5G13480.2	62.771	Chr04	Transducin/WD40 repeat-like superfamily protein (FY)	Arabidopsis thaliana
CA3-1	Flowering	AUR62042408	AT3G01460.1	41.948	Chr01	Methyl-CPG-binding domain 9	Arabidopsis thaliana
CA3-1	Flowering	AUR62016340	AT3G15850.1	60.677	Chr17	Fatty acid desaturase 5	Arabidopsis thaliana
CA3-1	Flowering	AUR62028172	AT3G03090.1	62.6	Chr11	Vacuolar glucose transporter 1	Arabidopsis thaliana
CA3-1	Flowering	AUR62014852	AT2G33835.1	29.264	Chr01	Zinc finger C-x8-C-x5-C-x3-H type family protein	Arabidopsis thaliana
CA3-1	Flowering	AUR62018509	AT3G12810.1	56.925	Chr07	SNF2 domain-containing protein / helicase domain-containing protein	Arabidopsis thaliana
CA3-1	Flowering	AUR62019429	AT3G15354.1	58.954	Chr12	SPA1-related 3	Arabidopsis thaliana
CA3-1	Flowering	AUR62019802	AT4G11110.1	43.515	Chr16	SPA1-related 2	Arabidopsis thaliana
CA3-1	Flowering	AUR62042926	AT3G18990.1	28.035	Chr15	AP2/B3-like transcriptional factor family protein	Arabidopsis thaliana
CA3-1	Flowering	AUR62017871	AT1G09570.1	75.245	Chr15	Phytochrome A	Arabidopsis thaliana
CA3-1	Flowering	AUR62031643	AT3G04680.1	71.733	Chr04	CLP-similar protein 3	Arabidopsis thaliana
CA3-1	Flowering	AUR62017848	AT4G15090.1	47.619	Chr15	FRS (FAR1 Related Sequences) transcription factor family (FAR1)	Arabidopsis thaliana
CA3-1	Flowering	AUR62010060	AT1G65480.1	77.059	Chr15	PEBP (phosphatidylethanolamine-binding protein) family protein	Arabidopsis thaliana
CA3-1	Flowering	AUR62008114	AT5G49020.1	77.176	Chr16	Protein arginine methyltransferase 4A	Arabidopsis thaliana
CA3-1	Flowering	AUR62020806	AT2G28550.3	44.772	Chr04	related to AP2.7	Arabidopsis thaliana
CA3-1	Flowering	AUR62007465	AT1G62750.1	83.143	Chr13	Translation elongation factor EFG/EF2 protein	Arabidopsis thaliana
CA3-1	Flowering	AUR62002747	AT5G46210.1	80.05	Chr01	Cullin4	Arabidopsis thaliana
CA3-1	Flowering	AUR62022015	AT4G21200.1	57.349	Chr01	Gibberellin 2-oxidase 8	Arabidopsis thaliana
CA3-1	Flowering	AUR62002058	AT3G03090.1	61.446	Chr07	vacuolar glucose transporter 1	Arabidopsis thaliana
CA3-1	Flowering	AUR62034225	AT4G27430.1	38.005	Chr05	COP1-interacting protein 7 (CIP7)	Arabidopsis thaliana
CA3-1	Flowering	AUR62021636	AT5G61380.1	47.049	Chr08	CCT motif -containing response regulator protein	Arabidopsis thaliana
CA3-1	Flowering	AUR62025282	AT5G20730.1	59.777	Chr01	Transcriptional factor B3 family protein / auxin-responsive factor AUX/IAA-like protein (NPH4)	Arabidopsis thaliana
CA3-1	Flowering	AUR62018672	AT2G23380.1	88.462	Chr16	SET domain-containing protein	Arabidopsis thaliana
CA3-1	Flowering	AUR62000472	AT4G16845.1	45.726	Chr12	VEFS-Box of polycomb protein (VRN2)	Arabidopsis thaliana
CA3-1	Flowering	AUR62007348	AT5G46910.1	55.666	Chr13	Transcription factor jumonji (jmj) family protein / zinc finger (C5HC2 type) family protein	Arabidopsis thaliana
CA3-1	Flowering	AUR62016972	AT1G61040.1	57.402	Chr02	Plus-3 domain-containing protein (VIP5)	Arabidopsis thaliana
CA3-1	Flowering	AUR62016062	AT5G51820.1	80.179	Chr07	Phosphoglucomutase	Arabidopsis thaliana
CA3-1	Flowering	AUR62022061	AT4G32980.1	52.711	Chr04	Homeobox protein ATH1	Arabidopsis thaliana
CA3-1	Flowering	AUR62025474	AT1G04010.1	76.172	Chr07	Phospholipid sterol acyl transferase 1	Arabidopsis thaliana
CA3-1	Flowering	AUR62027025	AT1G69935.1	52.055	Chr15	Short hypocotyl in white light1	Arabidopsis thaliana
CA3-1	Flowering	AUR62021670	AT3G47500.1	48.387	Chr08	Cycling DOF factor 3	Arabidopsis thaliana
CA3-1	Flowering	AUR62008898	AT2G20180.2	34.375	Chr17	Phytochrome interacting factor 3-like 5	Arabidopsis thaliana
CA3-1	Flowering	AUR62013696	AT2G44950.1	49.568	Chr10	Histone mono-ubiquitination 1	Arabidopsis thaliana
CA3-1	Flowering	AUR62012337	AT1G01640.1	52.88	Chr03	BTB/POZ domain-containing protein	Arabidopsis thaliana
CA3-1	Flowering	AUR62031932	AT1G52800.1	48.693	Chr15	2-oxoglutarate (2OG) and Fe(II)-dependent oxygenase superfamily protein	Arabidopsis thaliana
CA3-1	Flowering	AUR62014263	AT5G04240.1	54.592	Chr14	Zinc finger (C2H2 type) family protein / transcription factor jumonji (jmj) family protein (ELF6)	Arabidopsis thaliana
CA3-1	Flowering	AUR62026733	AT1G80680.1	51.134	Chr10	SUPPRESSOR OF AUXIN RESISTANCE 3	Arabidopsis thaliana
CA3-1	Flowering	AUR62015008	AT5G35840.1	57.748	Chr15	Phytochrome C	Arabidopsis thaliana
CA3-1	Flowering	AUR62000939	AT3G05040.1	59.893	Chr12	ARM repeat superfamily protein (HST)	Arabidopsis thaliana
CA3-1	Flowering	AUR62009286	AT5G25810.1	54.211	Chr01	Integrase-type DNA-binding superfamily protein	Arabidopsis thaliana
CA3-1	Flowering	AUR62032216	AT5G61850.1	63.824	Chr08	Floral meristem identity control protein LEAFY (LFY)	Arabidopsis thaliana
CA3-1	Flowering	AUR62009205	AT2G25930.1	36.412	Chr01	Hydroxyproline-rich glycoprotein family protein	Arabidopsis thaliana
CA3-1	Flowering	AUR62027884	AT1G60220.1	32.453	Chr03	UB-like protease 1D	Arabidopsis thaliana
CA3-1	Flowering	AUR62040372	AT4G15880.1	45.187	Chr11	Cysteine proteinases superfamily protein	Arabidopsis thaliana
CA3-1	Flowering	AUR62028034	AT4G31120.1	65.67	Chr01	SHK1 binding protein 1	Arabidopsis thaliana
CA3-1	Flowering	AUR62036789	AT5G23150.1	50	Chr07	Tudor/PWWP/MBT domain-containing protein	Arabidopsis thaliana
CA3-1	Flowering	AUR62005995	AT5G24470.1	32.733	Chr07	Two-component response regulator-like protein	Arabidopsis thaliana
CA3-1	Flowering	AUR62004274	AT2G45660.1	65.899	Chr01	AGAMOUS-like 20	Arabidopsis thaliana
CA3-1	Flowering	AUR62018436	AT1G72050.2	53.093	Chr07	Transcription factor IIIA	Arabidopsis thaliana
CA3-1	Flowering	AUR62037195	AT5G59560.1	52.727	Chr01	Sensitivity to red light reduced protein (SRR1)	Arabidopsis thaliana
CA3-1	Flowering	AUR62002957	AT3G54720.1	59.332	Chr06	Peptidase M28 family protein	Arabidopsis thaliana
CA3-1	Flowering	AUR62000483	AT1G09530.1	34.608	Chr12	Phytochrome interacting factor 3 (PIF3)	Arabidopsis thaliana
CA3-1	Flowering	AUR62012445	AT4G32040.1	71.218	Chr03	Homeobox protein knotted-1-like 5	Arabidopsis thaliana
CA3-1	Flowering	AUR62008064	AT1G31814.1	31.014	Chr16	FRIGIDA like 2	Arabidopsis thaliana
CA3-1	Flowering	AUR62039523	AT2G01570.1	64.079	Chr06	GRAS family transcription factor family protein	Arabidopsis thaliana
CA3-1	Flowering	AUR62010991	AT4G37880.1	53.728	Chr02	LisH/CRA/RING-U-box domains-containing protein	Arabidopsis thaliana
CA3-1	Flowering	AUR62016010	AT5G62040.1	69.143	Chr07	PEBP (phosphatidylethanolamine-binding protein) family protein	Arabidopsis thaliana
CA3-1	Flowering	AUR62023793	AT3G19040.1	45.768	Chr11	Histone acetyltransferase of the TAFII250 family 2	Arabidopsis thaliana
CA3-1	Flowering	AUR62004765	AT5G37260.1	48.472	Chr05	Homeodomain-like superfamily protein	Arabidopsis thaliana
CA3-1	Flowering	AUR62015577	AT1G04400.2	61.346	Chr16	Cryptochrome 2	Arabidopsis thaliana
CA3-1	Flowering	AUR62009440	AT3G02380.1	58.311	Chr01	CONSTANS-like 2	Arabidopsis thaliana
CA3-1	Flowering	AUR62011573	AT2G26710.1	60.2	Chr15	Cytochrome P450 superfamily protein (BSA1)	Arabidopsis thaliana
CA3-1	Flowering	AUR62009622	AT5G59820.1	39.196	Chr18	C2H2-type zinc finger family protein (RHL41)	Arabidopsis thaliana
CA3-1	Flowering	AUR62043270	AT4G02560.1	36.745	Chr17	Homeodomain-like superfamily protein	Arabidopsis thaliana
CA3-1	Flowering	AUR62007851	AT2G04030.1	78.125	Chr14	Chaperone protein htpG family protein (CR88)	Arabidopsis thaliana
CA3-1	Flowering	AUR62037741	AT4G14110.1	64.975	Chr01	COP9 signalosome, subunit CSN8	Arabidopsis thaliana
CA3-1	Flowering	AUR62020910	AT3G12810.1	57.647	Chr11	SNF2 domain-containing protein / helicase domain-containing protein	Arabidopsis thaliana
CA3-1	Flowering	AUR62040919	AT3G04510.1	77.622	Chr12	LIGHT-DEPENDENT SHORT HYPOCOTYLS-like protein (DUF640)	Arabidopsis thaliana
CA3-1	Flowering	AUR62000975	AT3G04910.1	59.697	Chr12	With no lysine (K) kinase 1	Arabidopsis thaliana
CA3-1	Flowering	AUR62022014	AT4G21200.1	48.413	Chr01	Gibberellin 2-oxidase 8	Arabidopsis thaliana
CA3-1	Flowering	AUR62005769	AT2G02950.1	32.394	Chr14	Phytochrome kinase substrate 1	Arabidopsis thaliana
CA3-1	Flowering	AUR62004272	AT2G45650.1	46.792	Chr01	AGAMOUS-like 6	Arabidopsis thaliana
CA3-1	Flowering	AUR62023494	AT2G46340.1	45.895	Chr10	SPA (suppressor of phyA-105) protein family	Arabidopsis thaliana
CA3-1	Flowering	AUR62019992	AT4G16780.1	60.738	Chr16	Homeobox protein 2	Arabidopsis thaliana
CA3-1	Flowering	AUR62028692	AT5G49020.1	77.807	Chr08	Protein arginine methyltransferase 4A	Arabidopsis thaliana
CA3-1	Flowering	AUR62009309	AT5G11530.1	35.78	Chr01	Embryonic flower 1 (EMF1)	Arabidopsis thaliana
CA3-1	Flowering	AUR62036007	AT5G02810.1	38.45	Chr04	Pseudo-response regulator 7	Arabidopsis thaliana
CA3-1	Flowering	AUR62000548	AT5G45830.1	25.352	Chr12	Delay of germination 1	Arabidopsis thaliana
CA3-1	Flowering	AUR62040712	AT3G46640.3	48.372	Chr04	Homeodomain-like superfamily protein	Arabidopsis thaliana
CA3-1	Flowering	AUR62026310	AT1G59940.1	67.683	Chr14	Response regulator 3	Arabidopsis thaliana
CA3-1	Flowering	AUR62042913	AT5G02840.1	64.167	Chr17	LHY/CCA1-like 1	Arabidopsis thaliana
CA3-1	Flowering	AUR62022307	AT1G71800.1	44.782	Chr10	Cleavage stimulating factor 64	Arabidopsis thaliana
CA3-1	Flowering	AUR62004893	AT3G04610.1	63.248	Chr05	RNA-binding KH domain-containing protein	Arabidopsis thaliana
CA3-1	Flowering	AUR62001502	AT1G72830.2	44.928	Chr07	Nuclear factor Y, subunit A3	Arabidopsis thaliana
CA3-1	Flowering	AUR62036478	AT2G31650.1	68.571	Chr08	Homologue of trithorax	Arabidopsis thaliana
CA3-1	Flowering	AUR62018922	AT4G08920.1	77.233	Chr10	Cryptochrome 1	Arabidopsis thaliana
CA3-1	Flowering	AUR62011728	AT2G33810.1	64.894	Chr08	Squamosa promoter binding protein-like 3	Arabidopsis thaliana
CA3-1	Flowering	AUR62037171	AT3G04910.1	50.133	Chr18	With no lysine (K) kinase 1	Arabidopsis thaliana
CA3-1	Flowering	AUR62033231	AT5G57360.2	82.964	Chr02	Galactose oxidase/kelch repeat superfamily protein	Arabidopsis thaliana
CA3-1	Flowering	AUR62016750	AT4G34530.1	36.667	Chr17	Cryptochrome-interacting basic-helix-loop-helix 1	Arabidopsis thaliana
CA3-1	Flowering	AUR62000893	AT1G08970.4	61.364	Chr12	Nuclear factor Y, subunit C9	Arabidopsis thaliana
CA3-1	Flowering	AUR62007714	AT1G77300.1	42.427	Chr10	Histone-lysine N-methyltransferase	Arabidopsis thaliana
CA3-1	Flowering	AUR62014191	AT2G01570.1	64.222	Chr14	GRAS family transcription factor family protein	Arabidopsis thaliana
CA3-1	Flowering	AUR62037093	AT1G17760.1	54.83	Chr16	Tetratricopeptide repeat (TPR)-like superfamily protein	Arabidopsis thaliana
CA3-1	Flowering	AUR62011599	AT1G15550.1	55.742	Chr15	Gibberellin 3-oxidase 1	Arabidopsis thaliana
CA3-1	Flowering	AUR62032129	AT5G60910.1	62.025	Chr08	AGAMOUS-like 8	Arabidopsis thaliana
CA3-1	Flowering	AUR62011705	AT5G42400.1	31.613	Chr08	SET domain protein 25	Arabidopsis thaliana
CA3-1	Flowering	AUR62036988	AT3G11540.1	77.526	Chr17	Tetratricopeptide repeat (TPR)-like superfamily protein	Arabidopsis thaliana
CA3-1	Flowering	AUR62018646	AT5G46910.1	54.682	Chr16	Transcription factor jumonji (jmj) family protein / zinc finger (C5HC2 type) family protein	Arabidopsis thaliana
CA3-1	Flowering	AUR62030470	AT5G41360.1	84.535	Chr16	Homolog of Xeroderma pigmentosum complementation group B 2	Arabidopsis thaliana
CA3-1	Flowering	AUR62032109	AT3G01460.1	40.999	Chr11	Methyl-CPG-binding domain 9	Arabidopsis thaliana
CA3-1	Flowering	AUR62038028	AT5G17690.1	33.939	Chr10	Like heterochromatin protein (LHP1)	Arabidopsis thaliana
CA3-1	Seed size	AUR62023491	AT2G46370.4	57.366	Chr10	Auxin-responsive GH3 family protein	Arabidopsis thaliana
CA3-1	Seed size	AUR62030282	AT2G26760.1	54.306	Chr11	Cyclin B1;4	Arabidopsis thaliana
CA3-1	Seed size	AUR62031677	Os04t0127800-01	27.796	Chr04	Coactivator CBP, KIX domain containing protein	Oryza sativa
CA3-1	Seed size	AUR62001420	Os03t0183000-01	36.386	Chr07	APETALA2/ethylene-responsive element binding protein 125, Transcription regulator, Positive regulator of grain length	Oryza sativa
CA3-1	Seed size	AUR62015027	AT5G35750.1	65.975	Chr15	Histidine kinase 2	Arabidopsis thaliana
CA3-1	Seed size	AUR62022717	AT2G46660.1	63.227	Chr10	Cytochrome P450, family 78, subfamily A, polypeptide 6	Arabidopsis thaliana
CA3-1	Seed size	AUR62007961	Os11g0247300-01	97.471	Chr14	Alpha-tubulin protein, Cell elongation and division	Oryza sativa
CA3-1	Seed size	AUR62001939	Os02t0763000-01	64.493	Chr07	FW2.2-like gene family protein, Regulation of grain width and weight	Oryza sativa
CA3-1	Seed size	AUR62032284	TraesCS5D02G445100	50.992	Chr09
CA3-1	Seed size	AUR62025282	AQQ80641.1	67.25	Chr01	Auxin response factor 19	Jatropha curcas
CA3-1	Seed size	AUR62010368	Os09t0520400-01	43.182	Chr15	Putative transcription factor (OsbZIP76 alone lacked transcriptional activation activity), Regulation of endosperm cellularization, Regulation of endosperm development	Oryza sativa
CA3-1	Seed size	AUR62000472	AT2G35670.1	40.541	Chr12	VEFS-Box of polycomb protein	Arabidopsis thaliana
CA3-1	Seed size	AUR62009233	AT3G16360.2	64.865	Chr01	HPT phosphotransmitter 4	Arabidopsis thaliana
CA3-1	Seed size	AUR62001575	Os06g0623700-01	39.645	Chr07	protein STRICTOSIDINE SYNTHASE-LIKE 10	Oryza sativa
CA3-1	Seed size	AUR62039456	Os05g0207500-01	86.472	Chr02	GSK3/SHAGGY-like kinase, Brassinosteroid signaling	Oryza sativa
CA3-1	Seed size	AUR62016731	AT4G34460.1	82.275	Chr17	GTP binding protein beta 1	Arabidopsis thaliana
CA3-1	Seed size	AUR62019411	AT5G53000.1	71.111	Chr05	2A phosphatase associated protein of 46 kD	Arabidopsis thaliana
CA3-1	Seed size	AUR62005635	AT1G27320.1	69.453	Chr14	Histidine kinase 3	Arabidopsis thaliana
CA3-1	Seed size	AUR62007328	AT4G02020.1	42.525	Chr13	SET domain-containing protein	Arabidopsis thaliana
CA3-1	Seed size	AUR62002840	Os05t0551000-01	27.143	Chr06	Iron-binding haemerythrin RING ubiquitin ligase, Iron-binding sensor, Regulation of iron acquisition	Oryza sativa
CA3-1	Seed size	AUR62019157	Os04g0576900-01	34.375	Chr10	LRR receptor-like kinase, Control of organ size	Oryza sativa
CA3-1	Seed size	AUR62028488	AT5G06250.2	52.273	Chr17	AP2/B3-like transcriptional factor family protein	Arabidopsis thaliana
CA3-1	Seed size	AUR62037832	AT2G37260.1	57.627	Chr14	WRKY family transcription factor family protein (TTG2)	Arabidopsis thaliana
CA3-1	Seed size	AUR62032341	Os01t0616900-00	68.585	Chr09	Ctps protein	Oryza sativa
CA3-1	Seed size	AUR62002762	AT5G04560.2	46.372	Chr06	HhH-GPD base excision DNA repair family protein	Arabidopsis thaliana
CA3-1	Seed size	AUR62004951	Os08t0332800-01	65.493	Chr05	Similar to F7O18.23 protein (SWP1) (Struwwelpeter 1 protein)	Oryza sativa
CA3-1	Seed size	AUR62018713	AT1G32640.1	47.206	Chr16	Basic helix-loop-helix (bHLH) DNA-binding family protein	Arabidopsis thaliana
CA3-1	Seed size	AUR62035439	Os04t0664400-02	40.514	Chr10	Auxin response factor, Transcriptional factor, Transcriptional regulation of plant height and leaf angle	Oryza sativa
CA3-1	Seed size	AUR62031392	Os08g0562500-01	51.23	Chr07	BAHD acyltransferase DCR	Oryza sativa
CA3-1	Seed size	AUR62006814	AT2G35670.1	48	Chr05	VEFS-Box of polycomb protein	Arabidopsis thaliana
CA3-1	Seed size	AUR62033821	AT3G19700.1	55.39	Chr10	Leucine-rich repeat protein kinase family protein	Arabidopsis thaliana
CA3-1	Seed size	AUR62004541	AKN45695.1	47.788	Chr01	Homeobox-leucine zipper protein ATHB-12-like	Brassica napus (rape)
CA3-1	Seed size	AUR62006002	TraesCS5D02G469900	26.415	Chr07
CA3-1	Seed size	AUR62041167	AT3G20630.1	71.287	Chr05	Ubiquitin-specific protease 14	Arabidopsis thaliana
CA3-1	Seed size	AUR62006083	AT5G53000.1	71.111	Chr07	2A phosphatase associated protein of 46 kD	Arabidopsis thaliana
CA3-1	Seed size	AUR62010242	AT1G49770.1	38.182	Chr15	Basic helix-loop-helix (bHLH) DNA-binding superfamily protein	Arabidopsis thaliana
CA3-1	Seed size	AUR62003488	Os09g0448500-01	57.447	Chr09	GS9	Oryza sativa
CA3-1	Seed size	AUR62018380	AT2G26760.1	54.436	Chr07	Cyclin B1;4	Arabidopsis thaliana
CA3-1	Seed size	AUR62020806	Os07t0235800-01	44.845	Chr04	AP2 domain containing transcription factor, Control of inflorescence architecture, Floral meristem establishment, Regulation of grain size	Oryza sativa
CA3-1	Seed size	AUR62002336	AT4G00260.1	25.815	Chr07	Transcriptional factor B3 family protein	Arabidopsis thaliana
CA3-1	Seed size	AUR62032561	Os04t0127800-01	28.617	Chr01	Coactivator CBP, KIX domain containing protein	Oryza sativa
CA3-1	Seed size	AUR62018790	AT5G47010.1	78.135	Chr16	RNA helicase	Arabidopsis thaliana
CA3-1	Seed size	AUR62035761	AT5G49660.1	61.884	Chr03	Leucine-rich repeat transmembrane protein kinase family protein	Arabidopsis thaliana
CA3-1	Seed size	AUR62007985	TraesCS5D02G469900	31.5	Chr14
CA3-1	Seed size	AUR62011973	TraesCS5D02G445100	50.281	Chr08
CA3-1	Seed size	AUR62014487	Os02g0137900-00	28.11	Chr03	Guanine nucleotide-binding protein subunit gamma 2-like	Oryza sativa
CA3-1	Seed size	AUR62034685	AT4G14720.1	41.337	Chr07	TIFY domain/Divergent CCT motif family protein	Arabidopsis thaliana
CA3-1	Seed size	AUR62032845	Os04t0615700-01	36.593	Chr06	ARGONAUTE (AGO) family protein, Regulation of anther development	Oryza sativa
CA3-1	Seed size	AUR62024322	Os07g0505200-01	70.115	Chr11	Plant-specific transcription factor, Control of grain size	Oryza sativa
CA3-1	Seed size	AUR62005645	Os08g0531600-01	42.561	Chr14	Transcription factor, Positive regulator of cell proliferation, Control of grain size, shape and quality	Oryza sativa
CA3-1	Seed size	AUR62028286	AQQ80641.1	67.076	Chr02	Auxin response factor 19	Jatropha curcas
CA3-1	Seed size	AUR62006172	AT2G36270.1	43.151	Chr07	Basic-leucine zipper (bZIP) transcription factor family protein	Arabidopsis thaliana
CA3-1	Seed size	AUR62040233	AT3G16360.2	67.769	Chr04	HPT phosphotransmitter 4	Arabidopsis thaliana
CA3-1	Seed size	AUR62006247	AT3G11580.1	50.862	Chr15	AP2/B3-like transcriptional factor family protein	Arabidopsis thaliana
CA3-1	Seed size	AUR62023852	AT4G00260.1	28.643	Chr11	Transcriptional factor B3 family protein	Arabidopsis thaliana
CA3-1	Seed size	AUR62037882	AT2G36530.1	88.409	Chr17	Enolase	Arabidopsis thaliana
CA3-1	Seed size	AUR62016163	AT3G16810.1	56.761	Chr07	Pumilio 24	Arabidopsis thaliana
CA3-1	Seed size	AUR62002298	AT1G25540.1	53.071	Chr07	Phytochrome and flowering time regulatory protein (PFT1)	Arabidopsis thaliana
CA3-1	Seed size	AUR62003911	AT4G36920.1	47.959	Chr09	Integrase-type DNA-binding superfamily protein	Arabidopsis thaliana
CA3-1	Seed size	AUR62035759	AT3G19700.1	27.586	Chr03	Leucine-rich repeat protein kinase family protein	Arabidopsis thaliana
CA3-1	Seed size	AUR62030636	Os02t0202400-01	69.825	Chr04	Ubiquitin-specific protease, Deubiquitination enzyme, Positive regulation of grain width and size	Oryza sativa
CA3-1	Seed size	AUR62037966	AT1G17110.2	48.932	Chr05	Ubiquitin-specific protease 15	Arabidopsis thaliana
CA3-1	Seed size	AUR62016172	AGH13207.1	58.917	Chr07	Pre-mRNA-processing factor 19-like	Triticum aestivum (bread wheat)
CA3-1	Seed size	AUR62006132	Os06t0528600-01	71.274	Chr07	Spermine synthase, Spermidine synthase, Negative regulation of seed germination, grain size, and grain yield, Chilling response	Oryza sativa
CA3-1	Seed size	AUR62032631	Os06t0265400-01	64.426	Chr01	Similar to Transcription factor HBP-1b(C38) (Fragment)	Oryza sativa
CA3-1	Seed size	AUR62010051	AT4G38600.1	71.485	Chr15	HECT ubiquitin protein ligase family protein KAK	Arabidopsis thaliana
CA3-1	Seed size	AUR62035726	Os04t0664400-02	62.937	Chr03	Auxin response factor, Transcriptional factor, Transcriptional regulation of plant height and leaf angle	Oryza sativa
CA3-1	Seed size	AUR62007714	AT1G77300.1	42.427	Chr10	Histone-lysine N-methyltransferase	Arabidopsis thaliana
CA3-1	Seed size	AUR62031384	AT1G63700.1	58.232	Chr07	Protein kinase superfamily protein	Arabidopsis thaliana
CA3-1	Seed size	AUR62008879	TraesCS6B02G432600	72.931	Chr17
CA3-1	Seed size	AUR62022366	AT4G09960.3	67.826	Chr10	K-box region and MADS-box transcription factor family protein	Arabidopsis thaliana
CA3-1	Seed size	AUR62023061	AT3G63530.1	56.614	Chr04	RING/U-box superfamily protein	Arabidopsis thaliana
CA3-1	Seed size	AUR62030539	AT2G41510.1	69.439	Chr04	Cytokinin oxidase/dehydrogenase 1	Arabidopsis thaliana
CA3-1	Domestication	AUR62003712	tr|B4G1C5	51.376	Chr09	Homeobox-leucine zipper protein HOX12	Zea mays
CA3-1	Domestication	AUR62006205	tr|Q9LD97	59.728	Chr15	Beta-fructofuranosidase	Solanum lycopersicum (tomato)
CA3-1	Domestication	AUR62039456	sp|Q60EZ2	86.436	Chr02	Shaggy-related protein kinase GSK2	Oryza sativa Japonica Group (Japanese rice)
CA3-1	Domestication	AUR62004948	tr|Q07795	42.857	Chr05	Opaque-2	Sorghum bicolor
CA3-1	Domestication	AUR62001939	tr|Q9LKV7	62.338	Chr07	Protein fruit weight 2.2	Solanum lycopersicum (tomato)
CA3-1	Domestication	AUR62012386	BAG12386.1	53.182	Chr03	Ethylene-responsive transcription factor(Nud)	Hordeum vulgare subsp. vulgare
CA3-1	Domestication	AUR62021335	sp|D0TZF0	75.987	Chr01	Isoamylase 1, chloroplastic-like	Oryza sativa Japonica Group (Japanese rice)
CA3-1	Domestication	AUR62026247	GRMZM2G316366	77.011	Chr14	MADS2	Zea mays
CA3-1	Domestication	AUR62006009	Os06t0133000-01	68.48	Chr07	Granule-bound starch synthase 1, chloroplastic/amyloplastic	Oryza sativa Japonica Group
CA3-1	Domestication	AUR62005645	tr|A0A1B1MQB5	39.13	Chr14	Teosinte glume architecture 1	Zea mays
CA3-1	Domestication	AUR62010060	HORVU3Hr1G087100.1HvFT1	79.412	Chr15
CA3-1	Domestication	AUR62003602	tr|Q5MP56	57.746	Chr09	Barren stalk1	Zea mays
CA3-1	Domestication	AUR62005988	gb|AFN17366.1	61.047	Chr07	Tan1	Sorghum bicolor
CA3-1	Domestication	AUR62033546	tr|Q84J67	73.846	Chr07	Amylose extender starch-branching enzyme	Zea mays
CA3-1	Domestication	AUR62043163	LOC_Os07g11020.1	44.444	Chr17	Rc
CA3-1	Domestication	AUR62009440	sp|Q9FDX8	47.938	Chr01	Zinc finger protein HD1	Oryza sativa Japonica Group (Japanese rice)
CA3-1	Domestication	AUR62015201	LOC_Os10g25780.1	83.824	Chr15	Putative Cell elongation protein DIMINUTO (Cell elongation protein Dwarf1)	Oryza sativa Japonica Group
CA3-1	Domestication	AUR62040851	GRMZM2G039867	86.134	Chr07	BTB/POZ domain and ankyrin repeat-containing protein NPR5	Zea mays
CA3-1	Domestication	AUR62020806	tr|O65008	59.278	Chr04	Indeterminate spikelet 1	Zea mays
CA3-1	Domestication	AUR62028211	sp|Q7X7S8	77.541	Chr11	GPCR-type G protein COLD1	Oryza sativa Japonica Group (Japanese rice)
CA3-1	Domestication	AUR62001575	LOC_Os06g41850.1	39.645	Chr07	TGW6
CA3-1	Domestication	AUR62003911	LOC_Os04g55560.2	49.275	Chr09	SHAT1
CA3-1	Domestication	AUR62024112	Os07t0207700-01	74.419	Chr10	CTD small phosphatase-like protein 2	Oryza sativa Japonica Group
CA3-1	Domestication	AUR62009205	tr|K7KI62	40.946	Chr01	protein EARLY FLOWERING 3	Glycine max (soybean)
CA3-1	Domestication	AUR62009384	GRMZM5G870170	60.19	Chr01	MATE1	Zea mays
CA3-1	Domestication	AUR62004352	tr|Q8S483	39.269	Chr01	MAIZE R1-B73	Zea mays
CA3-1	Domestication	AUR62014191	sp|Q9ST59	54.932	Chr14	DELLA protein RHT-1	Triticum aestivum (bread wheat)
CA3-1	Domestication	AUR62018721	LOC_Os03g01014:LOC_Os03g01014.1.1	75.085	Chr16
CA3-1	Domestication	AUR62039523	sp|Q9ST59	55.308	Chr06	DELLA protein RHT-1	Triticum aestivum (bread wheat)
CA3-1	Domestication	AUR62022469	tr|A2YN44	49.438	Chr10	ORYSI Putative zinc finger protein Sdr4	Oryza sativa subsp. indica
CA3-1	Domestication	AUR62010992	tr|K4BVA0	65.333	Chr02	Transcription repressor OFP7-like	Solanum lycopersicum
CA3-1	Domestication	AUR62011582	tr|A8WCT6	62.906	Chr15	HORVU Boron transporter	Hordeum vulgare
CA3-1	Domestication	AUR62035617	Os06t0133000-01	68.62	Chr11	WX1 Granule-bound starch synthase, Synthesis of amylose in endosperm	Oryza sativa
CA3-1	Domestication	AUR62024322	LOC_Os08g39890.1	40.584	Chr11	IDEAL PLANT ARCHITECTURE 1 (IPA1)	Oryza sativa
CA3-1	Domestication	AUR62013454	Os01t0883800-02	49.432	Chr03	Gibberellin 20 oxidase 2	Oryza sativa Japonica Group
CA3-1	Domestication	AUR62003778	Os09t0369400-01	62.5	Chr09	Trehalose 6-phosphate phosphatase	Oryza sativa Indica Group
CA3-1	Domestication	AUR62035193	Glyma02g43700.1	59.955	Chr03
CA3-1	Domestication	AUR62039260	Sobic.001G148000.1	48.438	Chr11	SbWRKY
CA3-1	Domestication	AUR62007285	LOC_Os03g01014	79.835	Chr13
CA3-1	Domestication	AUR62009027	tr|A0A0H3VD96	52.174	Chr04	Phosphorus starvation tolerance 1	Oryza sativa
CA3-1	Domestication	AUR62025185	sp|P10290|MYBC_MAIZE	51.309	Chr01	Anthocyanin regulatory C1 protein	Zea mays
CA3-1	Domestication	AUR62018723	tr|Q4U4A8	79.412	Chr16	RAMOSA1 C2H2 zinc-finger transcription factor	Zea mays
CA3-1	Domestication	AUR62034410	LOC_Os04g38660.1	55.76	Chr01	Black hull 4 (Bh4)	Oryza sativa
CA3-1	Domestication	AUR62032216	tr|Q5Q1K7	51.862	Chr08	Floricaula/leafy-like 2	Zea mays
CA3-1	Domestication	AUR62032129	sp|Q39375	61.165	Chr08	Transcription factor CAULIFLOWER	Brassica oleracea var. italica
CA3-1	Domestication	AUR62011753	tr|D3UBS7	48.197	Chr08	Gibberellin 2-oxidase1	Helianthus annuus
CA3-1	Domestication	AUR62021445	Glyma.14g146700.1.pGmZFP	41.259	Chr01	E3 ubiquitin-protein ligase ATL42	Glycine max
CA3-1	Saponin	AUR62032397	AUR62032397	100	Chr04	Acetoacetyl-CoA thiolase (AACT)	Chenopodium quinoa
CA3-1	Saponin	AUR62036470	AUR62036470	100	Chr01	Acetoacetyl-CoA thiolase (AACT)	Chenopodium quinoa
CA3-1	Saponin	AUR62017311	AUR62017311	100	Chr16	Hydroxymethylglutaryl-CoA synthase (HMGS)	Chenopodium quinoa
CA3-1	Saponin	AUR62010579	AUR62010579	100	Chr13	Hydroxymethylglutaryl-CoA synthase (HMGS)	Chenopodium quinoa
CA3-1	Saponin	AUR62005132	AUR62005132	100	Chr05	Mevalonate kinase (MVK)	Chenopodium quinoa
CA3-1	Saponin	AUR62007367	AUR62007367	100	Chr13	Phosphomevalonate kinase (PMK)	Chenopodium quinoa
CA3-1	Saponin	AUR62007446	AUR62007446	100	Chr13	Mevalonate diphosphate decarboxylase (MVD)	Chenopodium quinoa
CA3-1	Saponin	AUR62006651	AUR62006651	100	Chr05	Isopentenyldiphosphate-isomerase (IDI)	Chenopodium quinoa
CA3-1	Saponin	AUR62010406	AUR62010406	100	Chr15	Squalene synthase (SS)	Chenopodium quinoa
CA3-1	Saponin	AUR62034985	AUR62034985	100	Chr10	Squalene epoxidase (SE)	Chenopodium quinoa
CA3-1	Saponin	AUR62025671	AUR62025671	100	Chr18	Beta-amyrin synthase (BAS)	Chenopodium quinoa
CA3-1	Saponin	AUR62031838	AUR62031838	100	Chr07	Beta-amyrin synthase (BAS)	Chenopodium quinoa
CA3-1	Saponin	AUR62025695	AUR62025695	100	Chr18	Beta-amyrin synthase (BAS)	Chenopodium quinoa
CA3-1	Saponin	AUR62025696	AUR62025696	100	Chr18	Beta-amyrin synthase (BAS)	Chenopodium quinoa
Shared	MEP	AUR62039630	AT5G60600.1	82.275	Chr18	4-hydroxy-3-methylbut-2-enyl diphosphate synthase (HDS)	Arabidopsis thaliana
Shared	Flavonoid	AUR62029466	AT3G51240.1	79.292	Chr15	Flavanone 3-hydroxylase	Arabidopsis thaliana
Shared	Flavonoid	AUR62039879	AT2G37040.1	82.951	Chr17	PHE ammonia lyase 1	Arabidopsis thaliana
Shared	Betalain	AUR62016865	Mj10	44.468	Chr17	BAHD acyltransferase	Mirabilis
Shared	Betalain	AUR62039410	Mj11	74.561	Chr14	UDP-glycosyltransferase (74B1-like)	Mirabilis
Shared	Flowering	AUR62007887	AT1G69120.1	62.162	Chr14	K-box region and MADS-box transcription factor family protein	Arabidopsis thaliana
Shared	Flowering	AUR62011317	AT2G21660.1	77.381	Chr15	Cold, circadian rhythm, and rna binding 2	Arabidopsis thaliana
Shared	Flowering	AUR62005080	AT1G54830.2	60.606	Chr05	Nuclear factor Y, subunit C3	Arabidopsis thaliana
Shared	Flowering	AUR62001265	AT3G48430.1	54.505	Chr07	Relative of early flowering 6	Arabidopsis thaliana
Shared	Flowering	AUR62039694	AT5G25810.1	54.726	Chr04	Integrase-type DNA-binding superfamily protein (TNY)	Arabidopsis thaliana
Shared	Flowering	AUR62023840	AT2G43410.2	42.945	Chr11	RNA binding protein (FPA)	Arabidopsis thaliana
Shared	Flowering	AUR62024851	AT4G21690.1	42.382	Chr01	Gibberellin 3-oxidase 3	Arabidopsis thaliana
Shared	Flowering	AUR62015561	AT5G28490.1	87.023	Chr16	LIGHT-DEPENDENT SHORT HYPOCOTYLS-like protein (DUF640)	Arabidopsis thaliana
Shared	Flowering	AUR62002133	AT1G04400.2	61.295	Chr07	Cryptochrome 2	Arabidopsis thaliana
Shared	Flowering	AUR62015122	AT2G32950.1	68.12	Chr15	Transducin/WD40 repeat-like superfamily protein	Arabidopsis thaliana
Shared	Flowering	AUR62023118	AT3G02380.1	58.556	Chr04	CONSTANS-like 2	Arabidopsis thaliana
Shared	Flowering	AUR62029984	AT1G53160.2	53.543	Chr11	Squamosa promoter binding protein-like 4	Arabidopsis thaliana
Shared	Flowering	AUR62006898	AT5G45830.1	28.906	Chr05	Delay of germination 1 (DOG1)	Arabidopsis thaliana
Shared	Flowering	AUR62007211	AT5G47010.1	79.561	Chr13	RNA helicase (LBA1)	Arabidopsis thaliana
Shared	Flowering	AUR62019452	AT1G53160.2	59.231	Chr12	Squamosa promoter binding protein-like 4	Arabidopsis thaliana
Shared	Flowering	AUR62017047	AT2G33835.1	34.058	Chr02	Zinc finger C-x8-C-x5-C-x3-H type family protein	Arabidopsis thaliana
Shared	Flowering	AUR62036157	AT1G30950.1	62.305	Chr05	F-box family protein (UFO)	Arabidopsis thaliana
Shared	Flowering	AUR62034836	AT3G48590.1	77.273	Chr16	Nuclear factor Y, subunit C1	Arabidopsis thaliana
Shared	Flowering	AUR62020307	AT2G24790.1	49.688	Chr12	CONSTANS-like 3	Arabidopsis thaliana
Shared	Flowering	AUR62002404	AT3G19040.1	37.037	Chr07	Histone acetyltransferase of the TAFII250 family 2	Arabidopsis thaliana
Shared	Flowering	AUR62004379	AT2G46020.2	61.437	Chr01	Transcription regulatory protein SNF2	Arabidopsis thaliana
Shared	Flowering	AUR62026097	AT3G57300.2	59.651	Chr07	DNA helicase INO80-like protein	Arabidopsis thaliana
Shared	Flowering	AUR62020697	AT3G49600.1	60.519	Chr04	Ubiquitin-specific protease 26	Arabidopsis thaliana
Shared	Flowering	AUR62034767	AT5G01040.1	49.733	Chr16	Laccase 8	Arabidopsis thaliana
Shared	Flowering	AUR62024511	AT3G57300.2	62.898	Chr11	DNA helicase INO80-like protein	Arabidopsis thaliana
Shared	Flowering	AUR62008425	AT3G47500.1	46.331	Chr16	Cycling DOF factor 3	Arabidopsis thaliana
Shared	Flowering	AUR62027766	AT4G08920.1	76.801	Chr03	Cryptochrome 1	Arabidopsis thaliana
Shared	Flowering	AUR62022688	AT1G01040.1	73.777	Chr10	Dicer-like 1	Arabidopsis thaliana
Shared	Flowering	AUR62011163	AT3G33520.1	67.677	Chr02	Actin-related protein 6 (ARP6)	Arabidopsis thaliana
Shared	Flowering	AUR62007118	AT2G39810.1	49.108	Chr13	Ubiquitin-protein ligase	Arabidopsis thaliana
Shared	Flowering	AUR62022770	AT2G27990.1	42.759	Chr04	BEL1-like homeodomain 8	Arabidopsis thaliana
Shared	Flowering	AUR62041615	AT5G02810.1	76.471	Chr01	Pseudo-response regulator 7	Arabidopsis thaliana
Shared	Flowering	AUR62008370	AT1G14400.1	92.763	Chr16	Ubiquitin carrier protein 1	Arabidopsis thaliana
Shared	Flowering	AUR62012541	AT1G79280.2	47.717	Chr02	Nuclear pore anchor	Arabidopsis thaliana
Shared	Flowering	AUR62001915	AT5G67100.1	56.603	Chr07	DNA-directed DNA polymerase	Arabidopsis thaliana
Shared	Flowering	AUR62040205	AT5G28450.1	86.111	Chr04	Chlorophyll A-B binding family protein	Arabidopsis thaliana
Shared	Flowering	AUR62024995	AT1G07980.1	56.14	Chr15	Nuclear factor Y, subunit C10	Arabidopsis thaliana
Shared	Flowering	AUR62037140	AT3G07650.1	53.412	Chr18	CONSTANS-like 9	Arabidopsis thaliana
Shared	Flowering	AUR62011797	AT4G02020.1	50.272	Chr08	SET domain-containing protein	Arabidopsis thaliana
Shared	Flowering	AUR62035217	AT2G24790.1	48.75	Chr14	CONSTANS-like 3	Arabidopsis thaliana
Shared	Seed size	AUR62029293	AT3G20630.1	72.375	Chr12	Ubiquitin-specific protease 14	Arabidopsis thaliana
Shared	Seed size	AUR62037693	Glyma17g33690.1	83.333	Chr04
Shared	Seed size	AUR62019452	Os07g0505200-01	77.5	Chr12	Plant-specific transcription factor, Control of grain size	Oryza sativa
Shared	Seed size	AUR62040833	Os06g0623700-01	39.871	Chr07	protein STRICTOSIDINE SYNTHASE-LIKE 10	Oryza sativa
Shared	Seed size	AUR62020310	Glyma17g33690.1	81.759	Chr12
Shared	Seed size	AUR62035077	AT3G16810.1	53.823	Chr11	Pumilio 24	Arabidopsis thaliana
Shared	Seed size	AUR62037305	Os05t0551000-01	27.273	Chr14	Iron-binding haemerythrin RING ubiquitin ligase, Iron-binding sensor, Regulation of iron acquisition	Oryza sativa
Shared	Seed size	AUR62031732	Os02g0137900-00	28.599	Chr04	Guanine nucleotide-binding protein subunit gamma 2-like	Oryza sativa
Shared	Seed size	AUR62027835	Os01t0680200-01	33.54	Chr03	Purine permease, "Regulation of grain size, grain number and leaf elongation", Modulation of cytokinin transport	Oryza sativa
Shared	Seed size	AUR62028842	Os02t0517531-01	47.964	Chr06	MEI2-like protein, Regulation of grain size and weight	Oryza sativa
Shared	Seed size	AUR62019156	Os04g0576900-01	33.333	Chr10	LRR receptor-like kinase, Control of organ size	Oryza sativa
Shared	Seed size	AUR62009710	Os05g0343400-01	50.885	Chr18	Probable WRKY transcription factor 26	Oryza sativa
Shared	Seed size	AUR62007211	AT5G47010.1	79.561	Chr13	RNA helicase	Arabidopsis thaliana
Shared	Seed size	AUR62018716	AT2G35230.1	41.379	Chr16	VQ motif-containing protein	Arabidopsis thaliana
Shared	Seed size	AUR62026114	AT2G41510.1	63.672	Chr07	Cytokinin oxidase/dehydrogenase 1 (CKX1)	Arabidopsis thaliana
Shared	Seed size	AUR62005852	Os04t0615700-01	36.626	Chr14	ARGONAUTE (AGO) family protein, Regulation of anther development	Oryza sativa
Shared	Seed size	AUR62000103	AT3G63530.1	43.802	Chr12	RING/U-box superfamily protein	Arabidopsis thaliana
Shared	Seed size	AUR62026999	Os06g0650300-01	38.303	Chr15	Probable N-acetyltransferase HLS1	Oryza sativa
Shared	Seed size	AUR62011797	AT4G02020.1	50.272	Chr08	SET domain-containing protein	Arabidopsis thaliana
Shared	Seed size	AUR62010883	Os05g0187500-01	44.603	Chr02	Protein IQ-DOMAIN 14	Oryza sativa
Shared	Domestication	AUR62023118	sp|Q9FDX8	47.792	Chr04	ORYSJ Zinc finger protein HD1	Oryza sativa subsp. japonica
Shared	Domestication	AUR62026999	Os06t0650300-01	38.303	Chr15	Histone H4 acetyltransferase, Regulation of grain weight, yield, and plant biomass	Oryza sativa
Shared	Domestication	AUR62031950	LOC_Os06g40780.1	40.553	Chr15	MOC1
Shared	Domestication	AUR62010933	Glyma.14g146700.	41.102	Chr02	pGmZFP
Shared	Domestication	AUR62011495	Os05t0156900-01	72.857	Chr15	Vacuolar H+-translocating pyrophosphatase, Regulation of grain chalkiness	Oryza sativa
Shared	Domestication	AUR62022770	LOC_Os05g38120.1	44.058	Chr04	SH5
Shared	Domestication	AUR62019452	Os07t0505200-01	77.5	Chr12	Plant-specific transcription factor, Control of grain size	Oryza sativa
Shared	Domestication	AUR62042882	Os03t0387100-01	94.915	Chr11	Proteasome alpha 2 subunit, Thermotolerance	Oryza sativa
Shared	Domestication	AUR62007887	sp|Q39375	57.48	Chr14	BRAOT Transcription factor CAULIFLOWER	Brassica oleracea var. italica
Shared	Domestication	AUR62016396	tr|A8WCT6	67.435	Chr17	HORVU Boron transporter	Hordeum vulgare
Shared	Domestication	AUR62007281	tr|Q4U4A8	33.588	Chr13	Ramosa 1	Zea mays
Shared	Domestication	AUR62029344	Glyma.12g221500.1.pGmNAC4	62.191	Chr12
Shared	Domestication	AUR62040833	LOC_Os06g41850.1	39.871	Chr07	TGW6
Shared	Saponin	AUR62027288	AUR62027288	100	Chr16	Mevalonate diphosphate decarboxylase (MVD)	Chenopodium quinoa
Shared	Saponin	AUR62027980	AUR62027980	100	Chr01	Lupeol synthase-like	Chenopodium quinoa
Shared	Saponin	AUR62017204	AUR62017204	100	Chr16	Triterpene saponin biosynthesis activating regulator 1 (TSAR1)	Chenopodium quinoa
CA3-1	Flowering	AUR62039694	AT5G25810.1	54.726	Chr04	Integrase-type DNA-binding superfamily protein (TNY)	Arabidopsis thaliana	STOP-GAIN
CA3-1	Flowering	AUR62006898-RA	AT5G45830.1	28.906	Chr05	Delay of germination 1 (DOG1)	Arabidopsis thaliana	STOP-GAIN
CA3-1	Flowering	AUR62036157-RA	AT1G30950.1	62.305	Chr05	F-box family protein (UFO)	Arabidopsis thaliana	STOP-GAIN
Longli-4	Domestication	AUR62007281	tr|Q4U4A8	33.588	Chr13	Ramosa 1	Zea mays	STOP-GAIN
