# Supplementary figures and images for: Genomic Variation Underlying the Breeding Selection of Quinoa Varieties Longli-4 and CA3-1 in China
Source: MDPI journal article supplement (doi:10.3390/ijms232214030), 2022-11-14

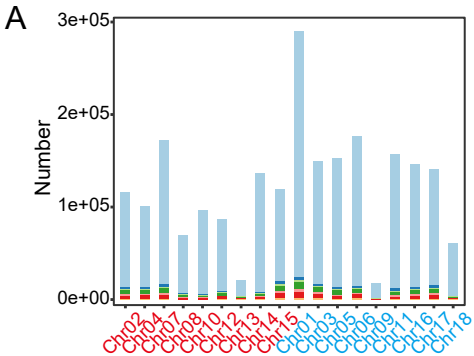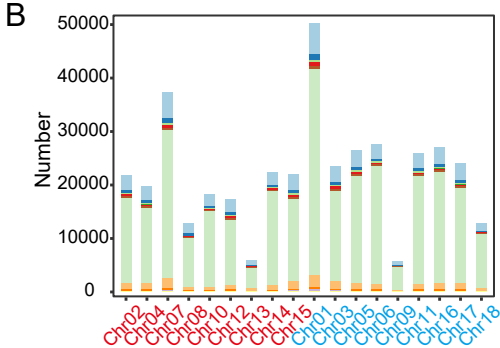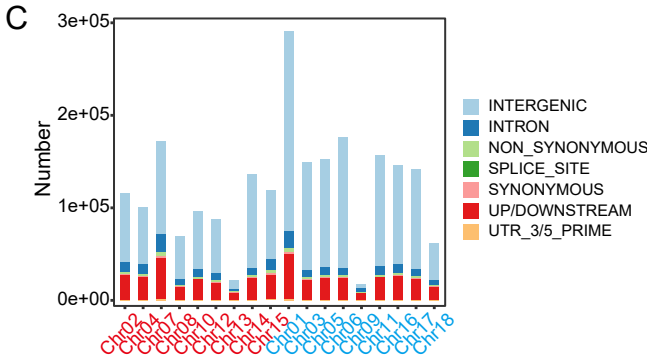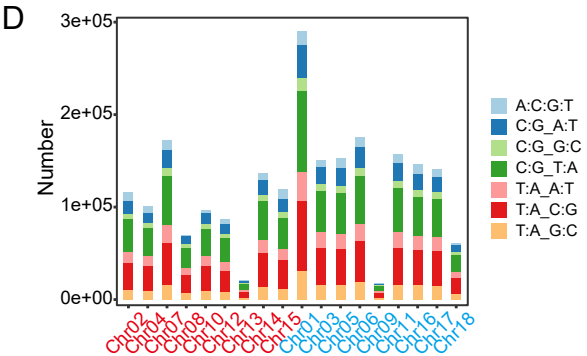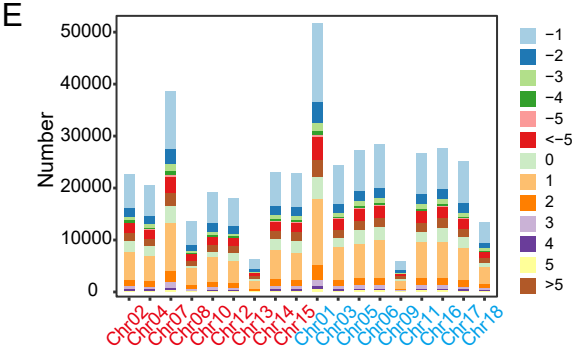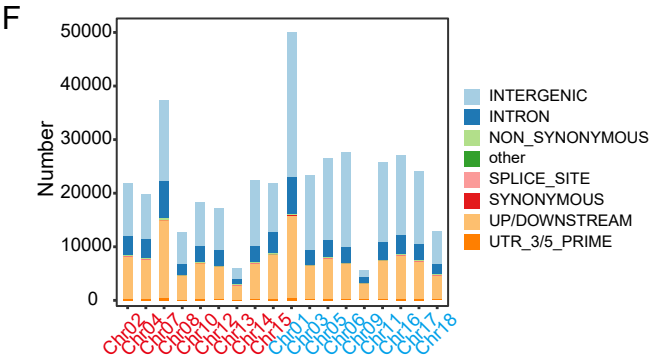

Supplement: s1 [file s1]

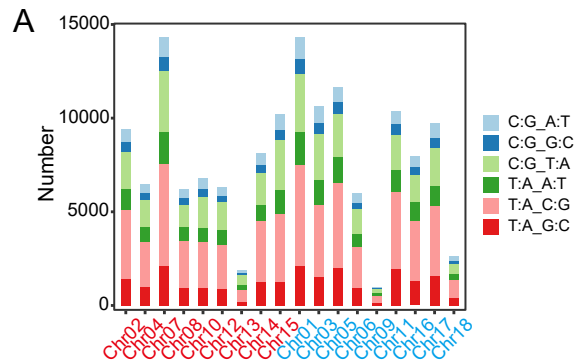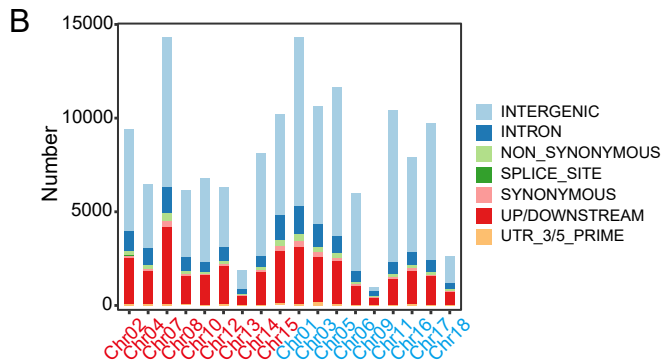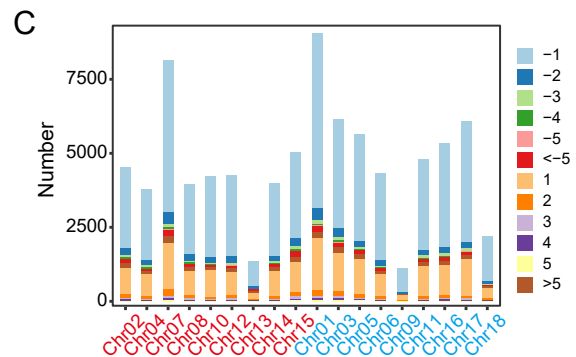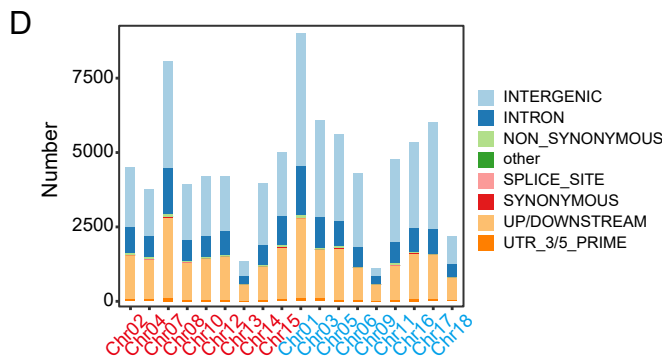

Supplement: s1 [file s1]

A

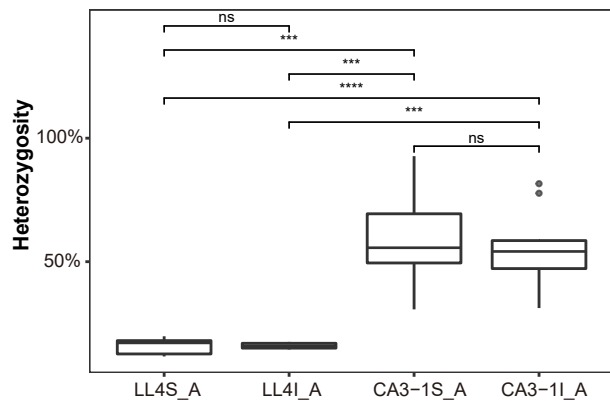

B

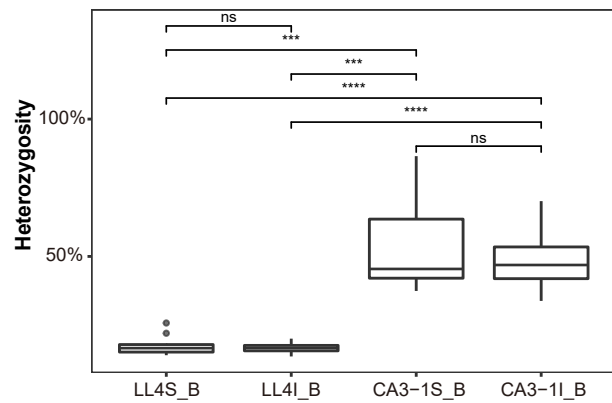

Supplement: s1 [file s1]

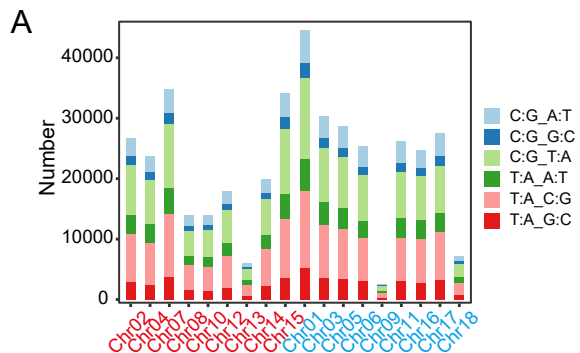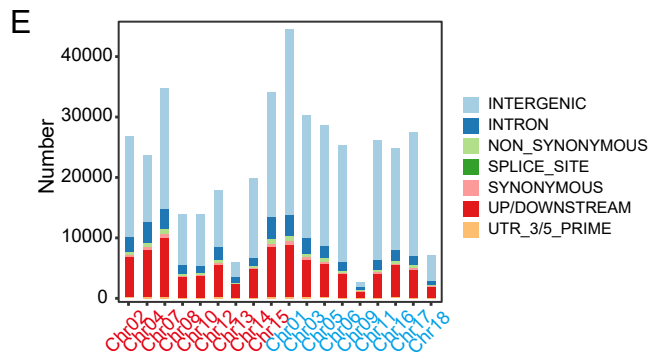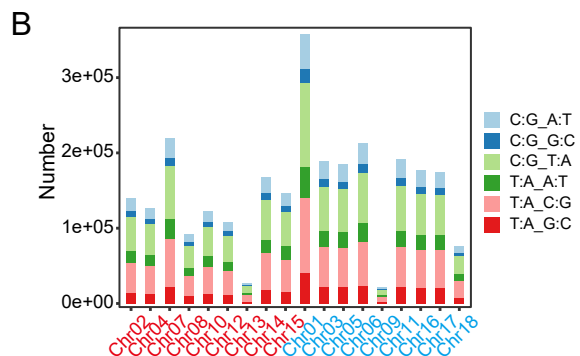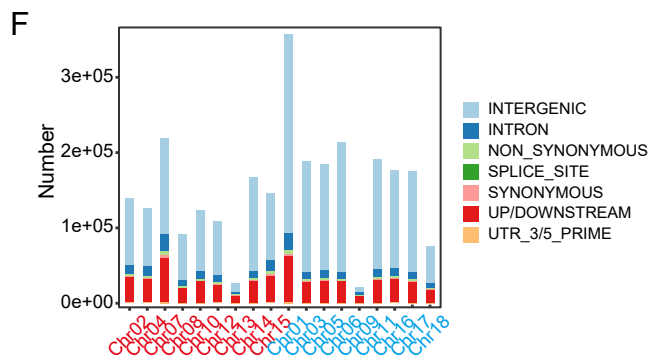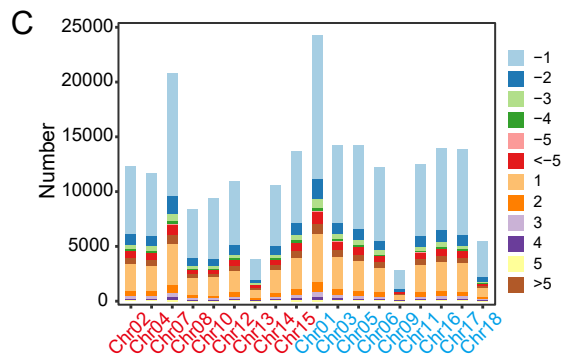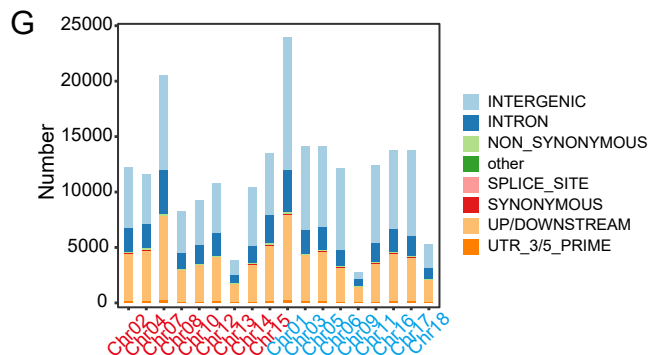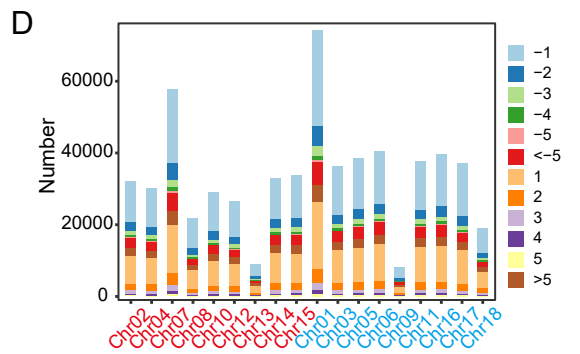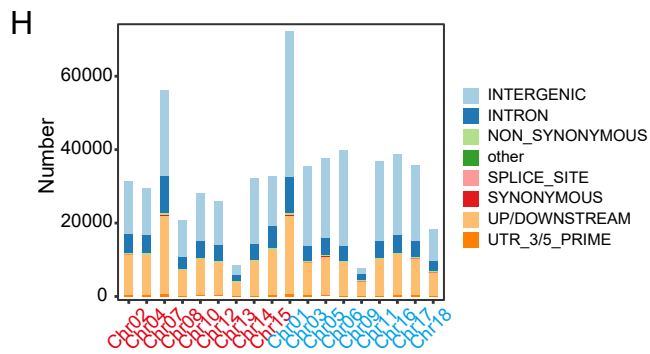

Supplement: s1 [file s1]

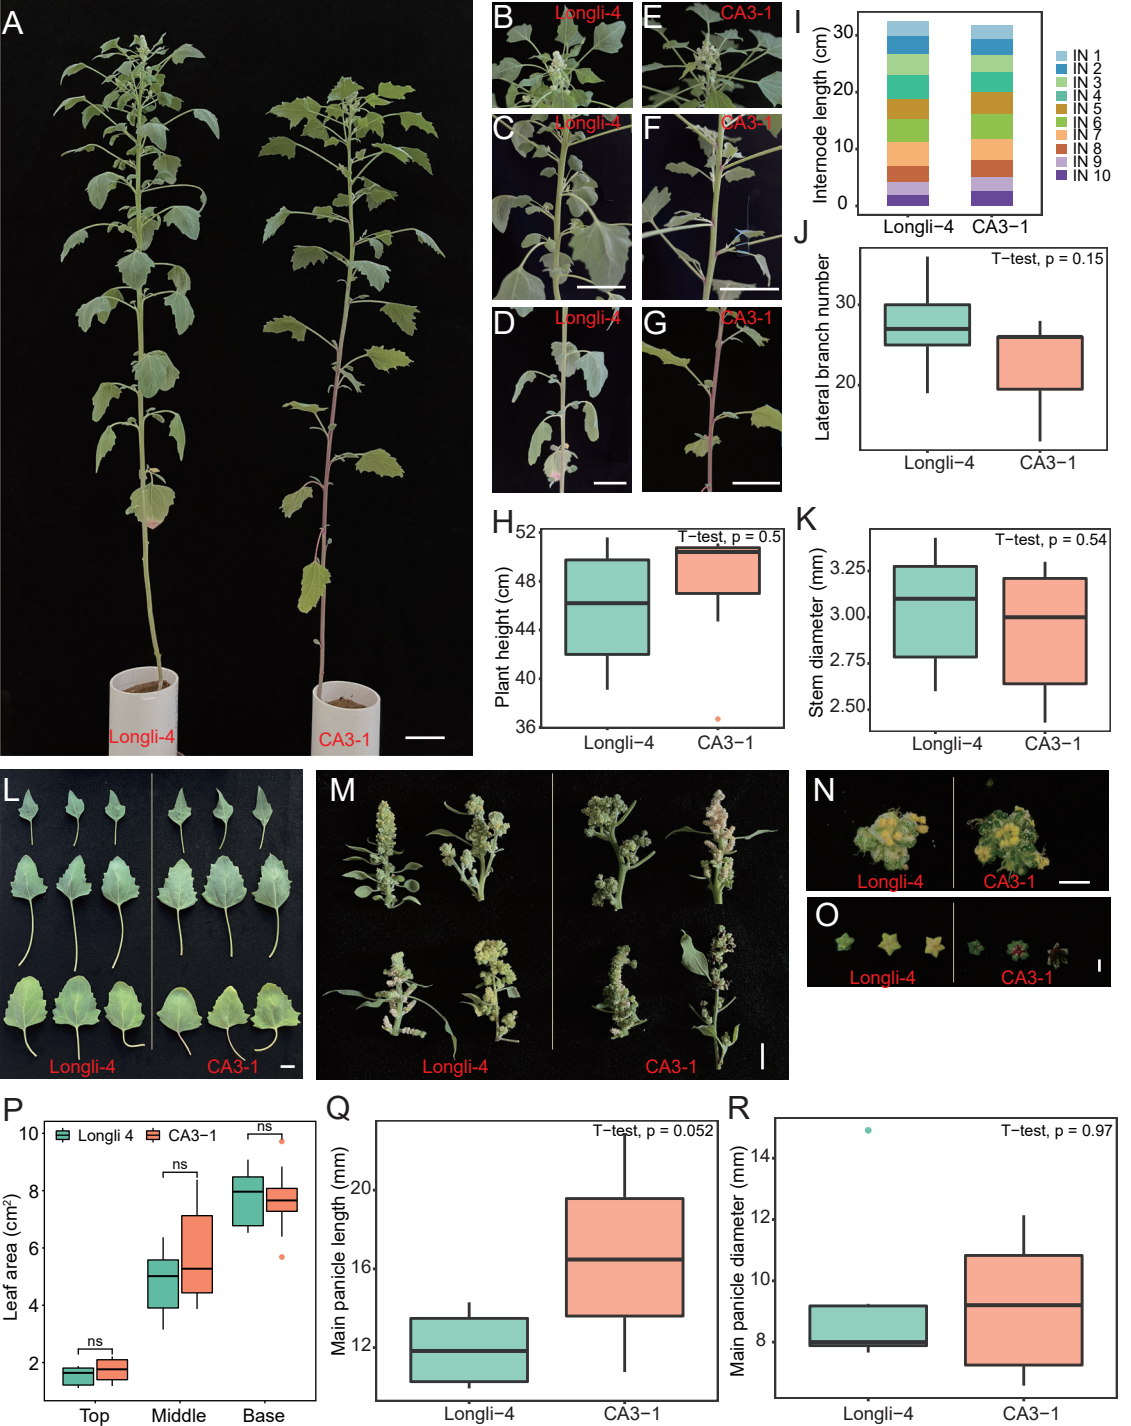

Supplement: s1 [file s1]
